# Supplementary material for: A highly accurate platform for clone-specific mutation discovery enables the study of active mutational processes
Source: eLife. 2020 Apr 7;9:e55207. doi: 10.7554/eLife.55207 (PMC7228773; doi:10.7554/eLife.55207)
Supplement: Figure 1—source data 1. [file elife-55207-fig1-data1.xlsx]

## Sheet: Sheet1
Raw values for the whole genome amplification monitoring of runs D1110 and D1111
	Normalized End RFU			Normalized Ct values
well ID	D1110	D1111	FailedRun	D1110	D1111	FailedRun
A001	0.851152	0.82056	1.94625	-0.912183	0.600347	9.20305
A002	0.865747	0.595342	0.149263	-1.10218	1.18035	15.483
A003	0.485114	0.732055	2.28846	-0.242183	1.22035	12.103
A004	1.04274	0.736356	2.38821	-0.312183	3.82035	16.753
A005	0.887762	0.74355	2.18216	-0.742183	-27.9997	15.133
A006	0.956834	0.834641	2.47413	-1.11218	4.18035	9.51305
A007	0.830038	0.91585	2.3256	-1.13218	-27.9997	15.463
A008	0.861709	0.852025	0.0378619	-0.442183	0.000346667	8.88305
A009	0.782408	0.685383	2.20691	-1.05218	-0.889653	9.79305
A010	0.946658	0.647006	2.54694	-0.682183	1.44035	14.983
A011	1.0231	0.847084	0.0327651	-0.822183	-3.24965	17.023
A012	0.901974	0.858067	2.51199	-0.622183	-0.469653	16.543
A013	1.05564	0.895036	2.53311	-0.722183	0.140347	7.67305
A014	0.932118	0.00468511	0.070627	-0.852183	-0.199653	14.993
A015	0.987578	0.343447	0.0334932	-0.302183	-0.159653	8.82305
A016	0.984741	0.881032	0.0349495	-1.36218	-2.70965	15.943
A017	0.996989	1.00546	2.25934	-0.182183	-1.12965	15.173
A018	0.999062	1.0126	2.25133	-0.352183	-4.11965	11.353
A019	0.944176	1.0072	0.0313089	-0.572183	-0.329653	13.733
A020	0.895563	0.6978	2.21929	-1.05218	2.06035	13.383
A021	0.970091	1.03751	0.0407744	-1.05218	0.380347	16.293
A022	1.06014	0.924094	2.50253	-6.33218	-27.9997	-14.297
A023	1.00937	1.00666	0.0451431	-1.22218	-0.739653	8.85305
A024	1.02531	0.967617	0.594869	-1.05218	1.87035	-14.297
B001	0.816234	0.546648	0.0604335	-0.482183	3.00035	5.58305
B002	0.795911	0.616515	0.03859	0.537817	1.62035	-1.10695
B003	0.813452	0.750463	1.03392	-0.592183	2.94035	3.70305
B004	0.847933	0.703637	2.44501	0.277817	3.21035	4.33305
B005	0.857454	0.778599	0.0313089	-0.592183	3.95035	13.543
B006	0.778888	0.243114	2.55714	0.527817	-0.329653	3.91305
B007	0.860209	0.679137	2.60155	-0.612183	3.32035	15.353
B008	0.770459	0.558271	0.0400463	0.00781671	2.01035	13.753
B009	0.930591	0.754918	0.0291246	-0.242183	1.66035	9.12305
B010	0.95517	0.2468	0.0283964	-0.212183	1.72035	13.563
B011	0.950887	0.503458	2.3569	-0.512183	-0.669653	7.42305
B012	0.86231	0.831748	2.46976	-0.0821833	-0.859653	17.283
B013	0.957679	0.869921	0.0313089	-0.212183	1.27035	16.783
B014	0.0977703	0.535946	2.38312	6.21782	1.41035	15.413
B015	1.09615	0.132514	1.71616	0.477817	-0.239653	7.96305
B016	1.00954	0.569152	0.0269402	0.197817	-2.70965	7.91305
B017	0.951896	0.882056	0.0356776	0.877817	0.490347	3.07305
B018	0.96188	0.571584	2.45593	1.49782	-3.45965	9.42305
B019	1.09288	0.930008	1.04339	1.29782	1.79035	14.493
B020	0.048585	0.700796	0.0305808	7.56782	3.84035	13.023
B021	1.0348	0.754764	2.58772	0.187817	2.69035	16.203
B022	0.132443	0.899158	0.0349495	-6.33218	9.33035	-7.59695
B023	1.02149	0.780289	0.0327651	-0.562183	1.71035	0.353048
B024	0.0125486	0.819844	0.0604335	10.1078	-27.9997	16.423
C001	0.9301	0.969921	0.0356776	-1.38218	1.21035	0.463048
C002	0.85298	0.836997	0.0342214	-0.132183	0.620347	-0.436952
C003	1.03976	1.07105	0.0371338	-1.08218	-0.649653	-12.077
C004	1.06317	0.884718	2.42389	-0.672183	1.52035	9.10305
C005	0.948568	0.744933	2.12609	-1.14218	1.22035	11.943
C006	0.91736	0.889429	2.50908	-0.332183	0.720347	8.67305
C007	1.02877	0.906813	0.0305808	-0.702183	3.80035	0.393048
C008	0.95266	1.04081	0.0415025	-0.852183	0.0303467	2.80305
C009	1.11309	0.951795	0.0334932	-0.812183	-0.789653	-2.26695
C010	1.07692	0.950745	0.966935	-0.622183	-0.469653	3.98305
C011	0.961471	0.827754	0.0378619	-1.03218	-3.38965	2.26305
C012	0.887161	0.831953	2.66854	-0.462183	-1.94965	4.60305
C013	1.1273	0.982414	2.04673	-0.832183	-0.699653	8.29305
C014	0.997044	0.851462	2.53238	0.107817	1.44035	2.33305
C015	0.942021	0.760806	0.0298527	-0.0621833	-1.20965	8.56305
C016	0.943658	0.885922	2.18653	-1.01218	-5.86965	1.14305
C017	1.03802	0.893704	0.0327651	1.05782	-0.289653	10.533
C018	1.02127	1.01657	0.032037	0.237817	-3.60965	8.45305
C019	1.11012	0.952281	2.5666	0.177817	-0.979653	11.963
C020	0.956697	0.799029	2.30011	-0.0321833	1.45035	11.733
C021	1.11211	0.894498	1.41909	-0.572183	0.300347	16.043
C022	1.12853	1.02778	0.0349495	-2.55218	4.78035	-8.71695
C023	1.30206	1.04409	0.173291	-0.872183	-1.10965	9.60305
C024	1.13472	0.941068	0.0305808	-1.18218	1.54035	10.383
D001	1.0229	0.702485	0.898493	-0.952183	2.28035	-1.60695
D002	1.00209	0.942732	2.27827	-0.132183	0.480347	-7.43695
D003	0.865692	0.965543	0.0327651	-0.142183	2.25035	0.863048
D004	0.985368	0.647365	2.32414	-0.112183	1.88035	-6.96695
D005	1.06257	0.980776	0.0342214	-0.502183	1.82035	13.353
D006	1.0219	0.474272	2.14065	-0.422183	1.79035	2.51305
D007	1.00719	0.84629	0.0327651	-0.402183	2.36035	8.82305
D008	0.997562	0.179775	0.03859	-0.262183	1.18035	13.363
D009	0.990197	0.606735	1.87344	-0.412183	3.12035	4.87305
D010	1.01712	0.819255	0.032037	-0.162183	1.53035	14.573
D011	1.07738	0.981134	2.26298	-0.882183	-4.07965	0.653048
D012	0.980785	0.763136	0.0334932	0.0878167	-0.0596533	4.29305
D013	1.02536	0.838482	2.18361	0.487817	1.62035	3.55305
D014	0.894036	0.70758	0.0378619	0.657817	2.18035	4.85305
D015	1.07255	0.920356	0.0356776	0.0278167	1.91035	8.10305
D016	0.941448	0.771815	0.0349495	-0.272183	-2.02965	8.69305
D017	1.07523	0.876859	2.678	0.877817	2.13035	6.67305
D018	0.0648164	0.845932	2.24769	9.01782	-0.449653	7.33305
D019	1.14883	1.06155	2.74936	0.577817	-0.529653	11.383
D020	0.799976	0.00166411	2.10134	0.927817	-1.68965	10.283
D021	1.10458	0.881569	2.4319	-0.152183	3.00035	-1.72695
D022	0.861846	0.931262	0.0334932	-1.90218	-27.9997	-9.05695
D023	1.04716	0.96137	0.0276683	-0.482183	0.630347	11.613
D024	0.00957516	0.834462	2.60956	10.4278	4.48035	14.943
E001	0.906694	0.95072	2.08095	-1.23218	0.0603467	-4.08695
E002	0.954815	0.956121	0.0334932	-2.94218	0.490347	-1.07695
E003	0.997753	1.00016	2.25351	-1.25218	0.0403467	5.46305
E004	1.21073	1.21972	0.0334932	-0.932183	-1.94965	3.50305
E005	0.943112	0.863418	2.32996	-0.972183	1.30035	0.243048
E006	0.972328	1.0752	0.032037	-1.02218	0.710347	2.26305
E007	1.03485	1.06045	2.18361	-1.32218	0.0303467	7.02305
E008	0.876686	0.961421	2.22657	-0.542183	0.460347	5.56305
E009	1.1847	0.97924	0.032037	-1.10218	0.990347	-7.44695
E010	0.983404	1.20008	0.0393182	-1.34218	-0.609653	2.68305
E011	1.13055	1.1522	2.37438	-1.18218	-6.09965	2.17305
E012	1.00946	1.00008	2.2688	-0.842183	-0.779653	6.57305
E013	1.18833	1.26106	1.97756	-0.992183	-1.87965	3.46305
E014	1.08674	1.15121	0.271586	-0.612183	-0.449653	2.35305
E015	1.09651	1.17837	1.45259	-0.532183	-0.939653	4.49305
E016	1.10614	1.14232	0.032037	-1.14218	-6.70965	4.24305
E017	1.16209	1.11698	0.0327651	0.697817	-0.729653	15.573
E018	1.07602	0.99944	2.34525	0.0978167	-3.75965	10.303
E019	1.1691	1.08777	1.46424	-0.192183	-1.41965	11.033
E020	1.07637	1.15423	0.0378619	-0.922183	-1.50965	5.80305
E021	1.30847	1.13413	0.0364057	-0.862183	-0.809653	-1.19695
E022	1.20691	1.22018	2.437	-2.66218	5.46035	-9.28695
E023	1.20011	1.20108	0.0371338	-0.742183	-1.28965	2.01305
E024	1.22832	1.13436	2.49015	-1.15218	-27.9997	2.94305
F001	1.02773	0.400846	2.24987	-0.662183	1.25035	-6.84695
F002	0.889016	1.04368	2.30739	-0.202183	-0.179653	-8.00695
F003	0.985695	1.09025	2.3256	-0.982183	1.72035	-6.01695
F004	1.11451	1.0671	2.83819	-0.372183	0.700347	-6.62695
F005	1.00891	0.619587	2.36855	-0.332183	3.44035	4.56305
F006	1.09473	1.12	2.74208	0.537817	1.25035	3.29305
F007	0.936728	0.995497	2.4603	-0.0321833	1.54035	3.07305
F008	1.01644	0.899772	0.0378619	0.507817	1.65035	-8.72695
F009	1.07995	0.978293	0.0422306	0.217817	0.280347	-2.14695
F010	1.08906	0.925169	0.0298527	0.597817	1.20035	0.233048
F011	0.992952	1.02537	1.64335	-0.372183	-3.70965	-0.976952
F012	0.631115	0.908886	0.025484	1.02782	-0.549653	4.13305
F013	1.19632	0.953689	2.47777	-0.302183	-0.539653	-3.42695
F014	1.10526	0.956403	0.891211	0.317817	1.16035	3.05305
F015	1.05711	0.963623	2.1574	-6.33218	1.06035	5.02305
F016	0.931982	0.854303	0.0262121	0.467817	-1.59965	-2.55695
F017	1.20407	0.990351	2.56806	1.59782	1.84035	4.49305
F018	1.01538	1.06559	0.0451431	1.88782	-3.75965	7.02305
F019	1.16659	1.15653	0.867184	0.797817	-0.649653	5.54305
F020	0.000709271	1.08231	0.0283964	11.2778	1.69035	7.72305
F021	1.17518	1.22153	0.0269402	-0.122183	0.150347	1.46305
F022	0.000327356	0.972327	0.0400463	-6.33218	11.0303	-9.36695
F023	1.21809	1.06877	1.9761	-0.252183	0.450347	12.233
F024	0.00406467	0.913623	0.0378619	11.2778	4.16035	4.26305
G001	0.697977	0.708527	0.0313089	-2.00218	0.790347	-5.53695
G002	1.00823	1.15218	0.0313089	-0.622183	-0.309653	2.74305
G003	0.956724	1.09163	0.0342214	-1.45218	0.310347	-6.02695
G004	0.936619	1.09532	0.032037	-0.702183	1.75035	3.94305
G005	0.996635	1.18093	0.0327651	-1.21218	0.760347	-0.436952
G006	1.02443	1.21949	0.0356776	-0.332183	1.47035	2.47305
G007	0.955442	1.10351	0.0276683	-0.662183	-0.929653	-6.28695
G008	1.04705	1.05515	0.0305808	-0.452183	-0.499653	-0.176952
G009	1.01109	1.19227	0.032037	-0.612183	-1.79965	-3.02695
G010	1.14444	0.8552	2.44573	0.297817	0.780347	-1.32695
G011	1.07411	1.13823	0.0305808	-0.872183	-5.43965	1.79305
G012	1.027	1.11222	0.0305808	-0.702183	-1.53965	0.243048
G013	1.08742	1.21327	0.0262121	1.35782	-1.61965	-1.59695
G014	1.01486	1.13856	0.0327651	0.217817	0.740347	-7.87695
G015	1.08546	1.26895	2.07076	-0.352183	-0.879653	1.90305
G016	0.984495	1.17955	2.13556	-0.682183	-6.74965	2.54305
G017	1.27333	1.15786	0.873009	0.557817	-0.129653	-2.34695
G018	0.923443	1.00643	0.0327651	0.557817	-3.74965	2.32305
G019	1.20751	1.20986	0.0305808	-0.172183	-1.63965	-0.816952
G020	1.00706	1.08792	0.0298527	0.287817	-0.819653	2.90305
G021	1.14536	1.22422	0.0349495	-0.432183	0.560347	-5.27695
G022	1.27993	1.20121	0.0305808	-2.67218	5.31035	-9.85695
G023	1.29248	1.26513	0.0334932	-1.30218	-0.649653	2.76305
G024	1.21094	1.13032	0.0342214	-0.972183	1.98035	3.66305
H001	0.934082	0.329929	0.025484	-1.04218	1.43035	3.57305
H002	1.10614	1.12005	0.0356776	-0.422183	-0.0696533	0.663048
H003	1.05556	1.12	2.24478	-1.04218	2.15035	0.673048
H004	0.878814	0.997468	0.0305808	0.337817	1.88035	4.29305
H005	1.07152	1.08649	0.0444149	-0.192183	2.77035	3.54305
H006	0.939484	0.910474	2.26007	0.127817	2.92035	3.89305
H007	0.962617	1.05121	2.01396	-0.0921833	0.720347	1.10305
H008	1.00921	1.07023	0.0356776	-0.922183	-0.119653	0.723048
H009	0.918042	0.798287	2.20983	0.907817	1.66035	3.23305
H010	0.868748	0.940069	0.032037	1.30782	0.520347	0.613048
H011	1.02604	0.954995	0.032037	-0.882183	-3.93965	0.963048
H012	1.1273	1.03395	2.17051	-0.532183	-0.629653	-6.65695
H013	0.97462	0.956403	0.0327651	0.447817	1.20035	4.80305
H014	1.02983	0.904278	0.0313089	0.347817	1.79035	-1.10695
H015	0.984359	1.00643	2.15085	0.647817	1.91035	-0.806952
H016	0.954651	0.899644	2.37729	0.147817	-2.08965	-10.437
H017	1.07326	1.09865	0.0327651	0.977817	0.280347	1.76305
H018	1.06429	1.0958	0.0283964	0.507817	-3.73965	4.99305
H019	1.07976	1.06782	0.0283964	0.237817	-0.379653	2.38305
H020	0.0976611	1.06152	2.5069	5.90782	1.43035	5.55305
H021	1.08529	1.09209	1.84286	-0.282183	1.42035	3.88305
H022	0.00510129	0.680545	2.58408	-6.33218	-27.9997	-14.297
H023	1.06958	1.05377	0.0283964	-0.672183	0.700347	-0.586952
H024	0.0688538	0.855635	2.34962	5.86782	4.03035	5.87305
I001	0.816071	0.711472	0.0334932	-2.45218	-0.239653	-5.85695
I002	0.990551	1.55971	0.0276683	-1.00218	-1.31965	0.793048
I003	0.86722	1.42146	2.05474	-1.81218	1.33035	0.0930481
I004	1.0872	1.33526	0.0313089	-1.06218	1.99035	1.07305
I005	0.923989	1.33459	0.523514	-1.35218	1.33035	-1.75695
I006	0.949086	1.53638	2.18798	-0.922183	0.260347	-8.05695
I007	0.90132	1.64857	0.0269402	-0.252183	-0.379653	1.12305
I008	0.898755	1.40187	0.0305808	0.287817	-1.69965	-6.09695
I009	0.920497	1.56821	0.0269402	-0.402183	-1.06965	-9.28695
I010	0.903065	1.39867	1.66083	-0.232183	-0.639653	0.973048
I011	0.954624	1.52348	0.032037	-1.26218	-6.42965	1.78305
I012	0.890762	1.34081	0.0334932	0.287817	-2.18965	2.00305
I013	1.15352	2.09581	0.172563	0.537817	-1.00965	-1.01695
I014	1.0931	1.39529	2.0875	0.707817	0.710347	-1.36695
I015	1.0471	1.42343	2.23094	1.18782	0.160347	1.70305
I016	0.816234	1.34332	0.0247559	-0.592183	-4.32965	-4.26695
I017	1.07397	1.52737	0.032037	0.687817	-0.549653	2.66305
I018	1.11178	1.62555	0.0269402	-0.292183	-3.99965	-3.82695
I019	1.11732	1.63961	0.0327651	-0.822183	-1.35965	0.853048
I020	1.05379	1.61447	0.0313089	-0.632183	-0.289653	0.803048
I021	1.07689	1.588	0.0262121	-0.732183	0.000346667	-3.20695
I022	1.17196	1.38347	2.16832	-2.06218	3.34035	-14.297
I023	1.25863	1.6284	2.28846	-1.25218	-1.04965	0.763048
I024	1.16048	1.54053	0.0269402	-1.09218	1.32035	0.803048
J001	1.08158	0.207886	0.0349495	-0.842183	-1.80965	-9.78695
J002	0.971046	1.4383	0.0305808	0.297817	-0.699653	-1.53695
J003	1.04405	1.35756	2.54767	-0.992183	1.84035	-10.367
J004	0.838822	0.153533	0.0313089	-0.412183	-0.809653	-4.99695
J005	0.865829	1.10564	0.0327651	0.787817	1.46035	-8.83695
J006	0.856908	0.360395	2.48651	18.9378	-0.0996533	-6.39695
J007	0.832629	1.23899	0.0334932	0.737817	0.140347	0.133048
J008	0.780498	1.13823	2.57243	1.31782	-0.719653	-3.62695
J009	0.842232	1.36183	1.89892	0.0978167	0.100347	-0.526952
J010	0.862692	1.38626	0.0313089	0.787817	0.160347	-8.92695
J011	0.889889	1.3404	0.0269402	-0.662183	-5.00965	0.283048
J012	0.979312	1.34171	1.28803	0.657817	-0.849653	-0.106952
J013	0.962262	1.22737	0.326923	0.997817	-0.459653	-4.11695
J014	0.939184	1.06357	0.0298527	1.39782	1.01035	-2.97695
J015	1.01243	1.34926	0.0626178	0.497817	-0.389653	-5.96695
J016	0.872621	0.975297	3.37626	-0.00218329	-2.26965	-7.55695
J017	0.986841	0.761318	0.032037	0.477817	0.500347	-7.47695
J018	0.651438	0.854585	2.95905	1.10782	-3.66965	-8.66695
J019	0.953287	1.29491	2.50835	0.217817	-0.409653	-7.47695
J020	0.0913868	1.29122	4.62789	5.10782	0.0103467	-7.10695
J021	1.07752	1.68032	2.61684	-0.312183	0.640347	-5.81695
J022	0.228576	0.915645	0.0334932	-0.382183	8.67035	-14.297
J023	0.994889	1.65305	1.71034	0.297817	-0.779653	-1.16695
J024	0.0303895	0.239197	0.0356776	7.46782	1.75035	-2.10695
K001	1.08598	0.773888	0.0313089	-2.30218	-0.609653	-2.21695
K002	1.16189	0.970791	0.0138342	-1.34218	-1.38965	-5.07695
K003	0.919624	0.968641	1.17372	-1.61218	-0.169653	-4.89695
K004	0.951678	0.994473	0.0152904	-1.16218	-0.159653	-1.29695
K005	0.988751	0.0983874	0.0240278	-0.712183	0.100347	-0.326952
K006	0.988778	1.04148	0.0167466	-0.952183	-0.729653	-12.677
K007	0.99658	1.05325	0.0276683	-0.0821833	-1.85965	-11.167
K008	1.02007	0.994063	0.00946548	0.677817	-0.709653	-8.92695
K009	1.02375	1.16511	1.25236	-0.722183	-1.72965	-4.80695
K010	1.12237	1.0371	0.0123779	0.807817	-1.96965	-0.826952
K011	1.12591	0.99117	2.29137	-1.11218	-6.84965	-7.56695
K012	1.02157	0.963572	0.0138342	0.887817	-2.66965	-0.336952
K013	1.01898	1.0575	2.38166	1.14782	-1.72965	-1.24695
K014	1.13363	1.07896	0.0152904	0.667817	-0.859653	-9.30695
K015	1.15063	1.03175	0.0356776	-0.632183	-0.439653	-7.69695
K016	1.199	1.01798	0.0123779	-1.25218	-5.98965	-6.05695
K017	1.2855	1.13956	0.0276683	-0.162183	-0.709653	-4.93695
K018	1.17002	1.1414	0.0283964	-0.762183	-4.50965	-2.46695
K019	1.19627	1.0755	0.0291246	-0.682183	-1.56965	-0.226952
K020	1.22687	1.08336	0.0291246	-1.28218	-0.0996533	-1.03695
K021	1.16716	1.0497	0.0283964	-1.30218	0.0803467	-12.137
K022	1.24807	1.06606	0.0334932	-2.53218	5.42035	-14.297
K023	1.3789	1.16388	1.86616	-1.56218	-1.15965	-4.46695
K024	1.22543	0.996035	0.101936	-1.02218	-27.9997	-11.657
L001	0.924371	0.898236	0.0291246	-0.762183	0.0603467	-9.08695
L002	0.861491	0.875015	2.10425	-0.572183	-3.41965	-9.50695
L003	1.02803	0.945522	1.22978	-0.862183	-27.9997	-0.416952
L004	0.928354	1.03922	0.0327651	-0.532183	0.290347	-12.107
L005	0.991042	1.11275	1.79844	-0.912183	1.78035	-6.71695
L006	0.95135	0.605762	0.0313089	-0.232183	-1.05965	-8.50695
L007	0.823436	0.858451	0.0291246	0.897817	0.140347	-8.56695
L008	1.00326	0.899286	0.0305808	0.737817	-0.389653	-11.517
L009	0.993225	0.976219	2.22948	-0.912183	-0.859653	-0.0269519
L010	0.921288	0.859577	0.0240278	1.23782	0.290347	-0.696952
L011	1.01827	0.899875	2.16978	-0.652183	-4.62965	0.973048
L012	0.968346	0.684539	2.00159	1.56782	-3.80965	-8.79695
L013	1.02612	1.03244	2.07949	1.51782	-0.239653	-1.06695
L014	0.844005	0.853971	1.8465	2.63782	-0.309653	-2.04695
L015	1.05215	0.955737	1.79407	1.38782	-0.629653	-6.87695
L016	0.169598	0.833976	1.90693	4.63782	-4.14965	-6.70695
L017	1.04972	0.978344	2.28191	0.357817	0.770347	-2.33695
L018	1.09487	0.97394	2.12536	0.377817	-5.84965	-5.86695
L019	1.04454	0.971431	0.198047	-0.332183	-0.269653	-0.616952
L020	0.0661804	1.02248	2.21419	6.23782	0.0803467	-7.00695
L021	1.16151	1.10098	2.09042	-0.612183	0.540347	-0.796952
L022	0.00886589	0.903843	0.0313089	-6.33218	8.95035	-10.437
L023	1.19629	1.02205	0.0538804	-0.682183	0.860347	-10.667
L024	0.00169134	0.679393	2.25643	9.21782	4.27035	-10.337
M001	1.24128	1.4147	2.25424	-1.32218	-0.229653	-10.257
M002	0.972601	0.853715	0.0582491	-0.702183	-0.509653	0.183048
M003	1.01712	1.08577	2.1625	-1.18218	1.07035	-11.067
M004	1.01928	1.11286	2.046	-0.682183	0.680347	-6.32695
M005	0.829247	1.13751	2.13847	-0.0321833	0.250347	0.513048
M006	0.985123	1.01209	0.0342214	-0.912183	0.840347	-11.677
M007	1.06543	1.2254	2.15085	-0.752183	-1.32965	-5.33695
M008	1.02724	1.28595	1.98484	-0.982183	-0.149653	-9.92695
M009	1.20066	1.40505	0.0349495	-1.00218	-1.53965	-0.0869519
M010	1.10908	1.17371	2.07804	-0.852183	0.510347	0.463048
M011	1.09978	1.27645	0.032037	-1.32218	-6.24965	-0.276952
M012	0.979639	1.0522	0.032037	-0.432183	-2.20965	-7.25695
M013	1.24619	1.3848	2.01833	-1.19218	-1.37965	-3.39695
M014	1.18541	1.32212	0.0327651	-0.762183	-0.219653	-1.89695
M015	1.22052	1.39665	2.19089	-0.762183	-1.57965	-10.567
M016	1.13947	1.22466	0.0327651	-1.13218	-5.07965	-8.76695
M017	1.01	1.14775	0.0291246	0.0278167	0.230347	-8.59695
M018	1.09604	1.24248	1.66083	-0.522183	-3.77965	-10.177
M019	1.28359	1.38874	2.00887	-0.872183	-1.27965	-10.157
M020	1.09642	1.29199	0.0305808	-0.882183	0.740347	-0.256952
M021	1.21457	1.42683	0.68734	-1.31218	0.490347	-0.146952
M022	1.23629	1.29647	0.032037	-2.80218	8.02035	-12.657
M023	1.30948	1.1947	0.0298527	-1.25218	0.480347	-1.07695
M024	1.20221	1.02499	0.0276683	-1.27218	3.88035	-5.80695
N001	1.01704	1.01288	0.0298527	-1.16218	-0.959653	-1.73695
N002	1.04557	1.00028	2.10425	-0.562183	-0.839653	-14.297
N003	1.12275	1.1935	0.0567929	-1.43218	0.890347	-0.446952
N004	1.1168	1.26457	2.22803	-1.00218	-1.30965	-8.99695
N005	0.943439	1.17059	0.0283964	-0.422183	-1.31965	-8.89695
N006	1.07525	0.723197	0.979313	-0.682183	-0.569653	-0.736952
N007	1.01606	0.933336	1.69432	-1.03218	0.550347	-2.79695
N008	1.08022	0.95648	2.38312	-0.552183	-0.809653	-14.297
N009	1.17698	0.417641	0.0342214	-0.652183	0.300347	-0.456952
N010	0.982449	0.915773	0.25484	-0.422183	-0.939653	0.0530481
N011	1.07135	0.463289	0.0262121	-0.962183	-3.56965	-5.94695
N012	1.02558	0.586049	2.43991	-0.602183	-1.35965	-10.607
N013	1.14184	1.15896	1.46351	-0.822183	-1.50965	-10.067
N014	1.07433	0.711497	2.1341	-0.0421833	0.000346667	-11.877
N015	1.04353	1.09145	2.20764	-0.622183	-0.379653	0.563048
N016	1.05649	1.01821	0.0283964	-0.0221833	-3.74965	1.03305
N017	1.06202	0.721943	1.31861	-0.122183	1.42035	-1.07695
N018	1.00632	0.964468	1.8596	0.447817	-3.03965	-1.48695
N019	1.176	1.10684	2.40933	-0.442183	0.500347	-0.616952
N020	0.0381097	1.15133	0.032037	7.51782	0.770347	-3.84695
N021	1.2637	0.00688686	0.03859	-0.532183	-0.109653	-11.717
N022	0.0018823	1.12945	2.20691	-6.33218	6.00035	-9.90695
N023	1.28746	1.25546	0.032037	-0.802183	-0.0396533	-4.61695
N024	0.00237333	0.915338	2.34525	11.6678	2.83035	-3.80695
O001	1.26193	1.39578	0.0276683	-6.33218	-0.319653	-0.666952
O002	1.33845	1.15991	1.77733	-1.03218	-0.229653	-14.297
O003	1.25945	1.02463	0.11213	-0.962183	-0.499653	-1.03695
O004	1.29578	1.09291	0.0334932	-0.862183	-1.61965	-1.10695
O005	1.33774	1.1691	2.23458	-1.40218	-2.83965	0.133048
O006	1.12769	1.08323	0.0334932	-0.932183	0.0303467	0.503048
O007	1.42727	1.17729	2.15886	-0.822183	-2.91965	-5.16695
O008	1.32194	1.02473	0.135429	-0.792183	-2.07965	-7.83695
O009	1.28116	1.18239	0.0371338	-1.09218	-3.17965	-3.83695
O010	1.38281	1.18917	0.0305808	-1.10218	0.450347	-8.27695
O011	1.50371	1.34002	0.0291246	-1.65218	-6.94965	-11.117
O012	1.35389	1.0371	2.05255	-1.28218	-0.979653	-0.0769519
O013	1.41931	1.27246	2.36127	-1.14218	-1.67965	-10.557
O014	1.45791	1.20881	1.7999	-1.15218	-1.00965	-0.496952
O015	1.44358	1.22079	2.2557	-1.30218	1.45035	-7.36695
O016	1.51159	1.31096	0.0305808	-1.00218	-6.89965	-1.11695
O017	1.23217	0.945753	0.0313089	-0.112183	-0.0796533	-0.386952
O018	1.41404	1.12648	0.0262121	-0.602183	-3.67965	-1.87695
O019	1.63863	1.24097	0.0283964	-1.17218	0.200347	-10.257
O020	1.40883	1.19665	0.0283964	-1.44218	-0.829653	-11.377
O021	1.52949	1.20663	0.0313089	-1.23218	-0.449653	-0.346952
O022	1.61654	1.2167	0.0349495	-2.45218	5.40035	-11.207
O023	1.62284	1.17563	0.0276683	-1.48218	-1.33965	-7.24695
O024	1.47321	1.30651	1.50938	-6.33218	1.27035	-7.74695
P001	0.819399	0.697595	0.0291246	-6.33218	2.32035	-0.876952
P002	1.14719	0.886664	0.0283964	-6.33218	2.10035	-1.24695
P003	1.37162	1.19025	0.75651	-1.20218	1.59035	-2.07695
P004	1.37484	1.07391	2.28919	-0.422183	-0.429653	-14.297
P005	1.29052	1.01442	0.032037	-1.22218	0.590347	-0.0469519
P006	1.11039	0.990914	1.16644	-0.242183	0.640347	-10.877
P007	1.32996	1.12335	2.12464	-1.11218	-0.209653	-0.796952
P008	1.19842	0.436535	1.09872	-0.412183	3.63035	-0.756952
P009	1.25459	1.03259	1.98047	-0.762183	1.11035	-1.14695
P010	1.29385	1.0753	0.0371338	-0.802183	0.610347	-5.33695
P011	1.27159	0.792655	2.03799	-1.04218	-2.96965	-0.306952
P012	1.01137	0.359448	0.0313089	-0.182183	-0.299653	-8.88695
P013	1.29483	1.0211	2.01469	-0.742183	-0.419653	-0.146952
P014	1.19215	0.778983	1.84723	-0.462183	1.94035	-11.897
P015	1.32677	0.953817	0.0327651	-0.0121833	3.69035	-0.386952
P016	1.20412	1.07916	0.0305808	-0.0621833	-3.31965	0.143048
P017	1.24444	1.06355	0.0327651	-0.182183	1.96035	-0.896952
P018	1.29846	1.08236	0.0305808	0.137817	-1.76965	-7.69695
P019	1.36322	1.08869	2.31103	-0.532183	1.66035	-0.536952
P020	1.27745	1.03405	2.32123	-6.33218	1.57035	-11.747
P021	1.38365	0.987919	0.807478	-0.992183	2.56035	-11.097
P022	0.00559233	0.48738	1.24289	-6.33218	9.14035	-7.62695
P023	1.39636	1.08344	1.83412	-1.66218	2.09035	-4.98695
P024	0.00158222	0.999056	2.39477	12.4578	0.510347	-10.617
