# Supplementary material for: A highly accurate platform for clone-specific mutation discovery enables the study of active mutational processes
Source: eLife. 2020 Apr 7;9:e55207. doi: 10.7554/eLife.55207 (PMC7228773; doi:10.7554/eLife.55207)
Supplement: Figure 1—source data 2. [file elife-55207-fig1-data2.xlsx]

## Sheet: Sheet1
Raw relative fluorescent values for miniaturized whole genome amplification reactions over time
Time (mins)	DNA - 9 replicates									NTC - 9 replicates									DNA-average	DNA-stdev	NTC-average	NTC-stdev
5	9.51513	10.6401	15.3616	8.51764	11.1207	15.0185	26.1234	15.2963	15.8555	4.91507	9.42222	6.34548	6.71217	7.52744	3.89629	12.0953	9.99061	-2.22194	14.161	5.29749	6.5203	4.16107
10	5.02141	8.16384	6.76655	9.83574	7.69069	11.4603	21.6611	9.65568	13.0714	2.70906	4.06247	2.19341	2.04173	7.26148	6.3423	6.62488	1.65127	-0.62116	10.3696	4.87864	3.58505	2.67172
15	5.77406	5.80339	7.96205	4.13239	8.44843	6.60058	15.5973	6.37942	8.22679	-1.00403	2.84763	1.46752	2.43146	1.5739	1.81842	3.26157	-1.32594	-0.850537	7.65826	3.28338	1.13555	1.7493
20	2.92201	5.78033	5.41069	1.92914	7.01872	6.35573	11.4243	5.53687	5.9898	-1.7622	2.59517	1.11949	2.08423	2.6601	0.0220952	3.44287	1.50176	-1.17341	5.81863	2.66804	1.16557	1.79488
25	2.64095	5.05715	2.99238	2.34718	3.29063	2.01046	7.86119	2.17188	2.91631	-2.77573	1.26825	-1.08629	0.283843	1.16472	-0.787455	0.0930562	0.101733	-0.259105	3.47646	1.87522	-0.221887	1.23458
30	3.1553	4.34849	4.65845	4.51663	3.28801	3.31457	4.00786	1.92465	1.9581	0.755628	1.40782	-1.11876	0.0852152	0.00537183	0.0681129	1.44963	1.44271	-1.1717	3.46356	1.02462	0.324892	1.02605
35	2.04069	2.65617	2.67781	2.7109	2.90145	1.20687	3.87148	2.19071	0.479425	0.130256	-2.49077	-4.40693	-0.307405	-1.17865	0.0520436	1.24019	1.11806	1.49107	2.30394	0.991098	-0.483571	1.93763
40	-0.568973	0.270337	0.263118	2.57709	1.73424	2.68496	2.55793	1.76489	2.98947	-2.86739	0.101687	-1.18594	1.30152	-2.68329	-0.80511	0.304387	-1.62959	-1.51913	1.5859	1.28857	-0.998095	1.38163
45	-0.700684	-1.21693	0.364291	-2.25283	0.8255	0.257186	-1.00857	-0.0590497	0.46025	-1.02249	-0.17273	0.660475	-3.63418	-1.44255	-3.34002	-0.0291017	-0.426715	-1.11022	-0.370093	0.995442	-1.16861	1.46117
50	-1.38383	0.209066	-0.947701	0.0778707	0.486216	-1.92407	-0.108044	-0.145701	0.461371	-1.15209	-1.59871	-1.64459	2.4534	-0.767155	2.28401	-1.91472	-0.127889	-0.551949	-0.363869	0.855534	-0.33552	1.63502
55	-3.1533	0.00992135	-0.0995716	0.248058	-1.284	-0.809685	-1.92607	-2.28195	0.73032	-0.644366	0.0590757	-0.648319	-2.6603	-0.045791	1.43475	-0.25408	-1.93597	-1.64518	-0.951808	1.30461	-0.704465	1.22625
60	-1.08182	0.0575995	-0.950537	-0.825603	-1.86796	-2.05316	-2.14738	-0.191551	-1.0879	-0.566615	-2.02004	-1.1424	-3.79708	0.532238	-1.49907	0.833434	0.181597	-0.396546	-1.12759	0.778771	-0.874942	1.44266
65	-2.70524	-0.790004	-3.07376	-0.727492	1.61875	-2.0028	-1.67788	0.115473	-1.08986	-1.50154	0.0813972	-2.81712	0.172885	-0.20561	0.71162	0.30173	0.937354	2.14279	-1.14809	1.44502	-0.0196103	1.42889
70	-2.84209	-3.8468	-3.76219	-1.88573	-1.73166	-5.51125	-3.14138	-4.63342	-1.29879	-4.14159	-2.63145	-1.62981	-3.0903	-0.462009	-5.07594	-3.81082	-1.44587	-3.48545	-3.1837	1.40348	-2.86369	1.467
75	-1.22827	-1.8561	-1.96603	-1.5658	0.378856	-2.46681	-5.17182	-2.37652	-3.93438	1.1877	1.27659	2.71111	-1.23932	-1.65499	-0.572335	1.33951	-0.849918	-0.58439	-2.24299	1.58491	0.17933	1.48162
80	-2.09498	-3.27396	-1.70798	-1.27988	-3.00182	-6.80788	-5.70385	-3.62794	-4.50348	-1.92768	-0.580627	-0.995993	-1.7093	0.176906	-0.0984392	-1.46221	-0.640285	-1.86283	-3.55575	1.84418	-1.01116	0.776522
85	-3.85464	-3.87133	-1.8452	-4.73717	-3.19853	-7.49882	-5.92455	-4.65792	-6.53798	-1.39224	-0.159772	-1.35373	0.824675	-1.34594	0.812456	-2.9124	0.581513	1.08835	-4.68068	1.75059	-0.428565	1.38293
90	-4.5331	-2.50435	-2.83926	-2.81795	-1.99299	-8.28619	-6.31256	-2.91067	-6.50622	1.55969	-2.70672	0.484709	-2.75033	2.52172	-0.781342	-2.4394	-2.50929	-3.32646	-4.30037	2.2268	-1.10527	2.14609
95	-4.58555	-5.2664	-4.04767	-2.9879	-3.39349	-4.97676	-2.80762	-5.36942	-2.07995	-3.50683	-0.245149	-0.823441	-2.6847	0.454311	0.274691	0.609595	-1.07788	1.15896	-3.94608	1.186	-0.648938	1.56573
100	-3.02229	-2.79538	-5.30137	-4.44924	-3.8848	-2.19898	-5.33123	-4.88722	-6.42255	-2.35031	2.86194	1.18718	0.553086	-0.555089	-0.470232	-0.573955	-2.11043	-1.67919	-4.25479	1.38759	-0.348555	1.67589
105	1.03819	0.660051	-5.90526	-2.54718	-3.60255	-1.36182	-6.70518	-5.43251	-3.56871	1.26097	1.17222	-0.173563	0.258808	0.0331158	1.68244	-1.40571	0.257563	0.0178931	-3.04722	2.76912	0.344859	0.92637
110	2.43861	-3.30349	-4.97768	-4.02171	-7.19518	-1.46752	-6.94016	-6.74383	-5.23082	-1.14538	-0.41627	-0.906852	0.829321	0.298232	1.05652	-2.61027	-3.52614	0.372962	-4.1602	3.10195	-0.671987	1.56216
115	3.86471	-5.05398	-2.2696	-6.0183	-7.79569	7.54675	-5.9776	-3.95878	-3.59141	0.477518	0.32888	0.128443	1.47333	-1.48066	-0.0458506	1.46224	1.99231	-1.94785	-2.58377	5.04721	0.265373	1.32219
120	14.0768	-4.87892	-2.64148	1.41686	-7.35551	24.9744	-5.0002	-0.451455	-6.79638	2.46176	0.0781482	0.165219	-1.56374	0.388487	0.516333	-0.217564	1.37313	2.27751	1.48269	10.9566	0.608809	1.26197
125	21.3743	-4.83259	-3.4138	0.407595	-4.269	45.9269	-3.82002	0.183192	-1.74904	-0.450064	-0.703446	-1.29737	-0.652521	-2.03042	-1.0556	-0.506928	2.20616	-0.884147	5.53417	17.1813	-0.597149	1.15865
130	37.1143	-3.49335	-4.38738	1.1097	-4.35769	92.9102	-7.15077	3.56698	1.07806	-0.0337044	0.625354	2.23762	0.0271729	-0.895022	0.125418	-2.11864	-2.44621	-0.110775	12.9322	32.8277	-0.287644	1.41231
135	56.9667	-3.56934	-0.725076	6.78835	-5.61913	174.884	-4.89241	10.6674	4.67089	1.33689	-0.557329	-2.39991	1.20053	-0.987488	-0.0149883	0.370984	-3.18023	-0.977116	26.5746	58.8686	-0.57874	1.51929
140	85.7661	-0.713251	0.778543	14.9816	-2.20954	302.515	-6.22058	15.8901	11.8432	0.331128	-1.18397	1.68614	0.382825	0.156162	0.196953	-3.27233	1.7263	1.92866	46.959	99.804	0.216874	1.64122
145	128.175	-0.661351	2.92436	29.8759	-0.890249	453.112	-3.7916	34.9614	18.9144	-2.37779	0.374892	2.42114	1.43876	-0.603592	1.15078	-0.410389	1.48265	2.05708	73.6244	148.093	0.614837	1.52525
150	182.56	0.493257	10.0519	48.802	-0.337579	616.696	-4.50941	72.1007	30.4424	-0.278142	1.38578	0.291817	1.06678	0.947875	0.71366	0.374486	1.83623	1.77895	106.255	200.206	0.901938	0.705686
155	252.953	5.74097	19.0705	79.9788	3.13991	791.458	-2.77899	127.035	41.8808	-0.903291	-0.0371424	-0.167989	2.36051	-1.21294	0.219575	1.22686	-1.70559	0.69523	146.498	255.426	0.0528028	1.26538
160	340.855	11.1462	31.8572	132.963	6.65147	973.488	-0.762321	244.79	65.3448	-2.37448	1.36917	-1.53612	-1.12421	-0.773082	0.183329	1.46549	0.216546	-1.50822	200.704	313.125	-0.453509	1.34098
165	437.125	14.7983	50.3149	207.452	10.2891	1154.04	1.15461	401.293	98.2732	-0.248585	1.16844	0.067856	-0.238747	0.436909	-0.224709	-0.0502816	-1.06272	-1.75968	263.861	372.975	-0.212391	0.833099
170	546.865	29.4175	78.5879	320.468	21.3284	1333.83	4.84185	574.462	144.67	1.83385	0.432741	0.70925	-1.99516	-0.911129	2.99722	-0.187218	-2.53797	1.63892	339.386	433.399	0.220057	1.82257
175	664.549	41.7379	119.219	468.995	30.9209	1516.01	9.70473	754.215	208.535	-0.955158	-0.386548	1.99995	3.61273	-1.4809	0.556392	0.664294	0.110605	-0.557111	423.765	496.614	0.396028	1.57989
180	785.386	58.638	178.11	643.164	47.9584	1700.47	16.5947	942.124	301.905	1.01254	0.519242	0.790936	0.222783	-0.289066	-2.15409	-0.890024	0.703552	-0.0231933	519.373	560.229	-0.0119254	0.998756
185	907.236	83.6492	257.572	840.857	74.5452	1886.53	21.966	1127.92	428.188	-1.64429	2.55838	-1.53633	0.973977	1.86909	-1.70456	0.154168	-2.24162	0.197124	625.385	622.904	-0.152673	1.72607
190	1030.36	120.451	370.452	1044.64	109.338	2075.2	36.9959	1310.16	570.411	1.0175	-0.731781	-0.347575	0.719499	0.927397	-0.787709	1.06295	-0.744094	2.3565	740.89	682.464	0.385855	1.09468
195	1154.97	166.213	509.661	1253.53	160.078	2265.62	52.8981	1486.72	736.783	-0.720474	0.44836	-1.45976	2.58264	-0.229919	1.54731	-1.90961	-1.97679	0.454668	865.163	739.149	-0.140398	1.56332
200	1280.05	234.593	667.184	1463.65	229.566	2453.38	73.2697	1656.37	913.533	0.180789	0.446002	1.68925	-1.64933	0.00660176	1.71512	0.830756	2.63896	2.52762	996.844	790.01	0.931752	1.36825
205	1404.87	318.708	845.337	1668.4	325.653	2634.36	105.719	1819.14	1092.87	0.546456	0.196151	2.56006	-0.858959	0.782975	0.474315	-2.77647	1.06873	1.14281	1135.01	832.163	0.348452	1.48033
210	1529.58	438.507	1027.57	1862.52	454.019	2799.22	145.116	1973.55	1275.34	1.3713	2.31505	-0.301593	0.665299	-1.40866	-1.08895	-0.954282	0.845418	-0.0435975	1278.38	861.155	0.155555	1.24263
215	1655.73	594.242	1214.98	2041.52	621.763	2948.7	203.02	2118.99	1462.46	-0.565651	-0.684309	1.49021	3.07937	-1.74457	1.83123	0.152691	-0.232993	-1.77965	1429.04	873.968	0.171815	1.65331
220	1784.37	804.091	1404.38	2200.43	858.951	3078.5	280.9	2253.94	1651.72	-1.10804	1.42965	-3.04514	-0.934404	0.964168	-0.193532	-0.938934	-1.53603	-0.725546	1590.81	863.926	-0.676423	1.32449
225	1914.84	1056.41	1593.44	2334.71	1110.88	3193.72	380.73	2380.19	1842.55	1.90313	-0.744281	-1.30188	-0.919473	2.3376	1.04538	0.572686	-2.6568	1.58977	1756.38	840.214	0.202904	1.68882
230	2042.64	1299.95	1773.5	2445.32	1372.14	3291.51	515.018	2496.06	2032.14	1.16197	-0.0725982	1.18058	0.87805	-1.39623	-1.60928	1.1591	0.44047	3.60196	1918.7	805.954	0.59378	1.55716
235	2162.74	1530.45	1937.6	2532.28	1621.35	3374.86	678.911	2603.63	2221.92	2.05108	-1.19431	0.438226	-0.750914	0.838989	0.701576	1.4207	0.408905	-2.71766	2073.75	764.668	0.132953	1.45763
240	2272.27	1749.18	2079.36	2602.07	1842.75	3445.35	873.714	2701.24	2406.88	-1.14942	-1.22466	1.41911	2.24813	-1.02023	1.35226	1.90905	-0.588425	-1.71428	2219.2	717.022	0.136838	1.56202
245	2369.82	1952.92	2197.09	2656.76	2030.99	3505.51	1075.09	2789.05	2585.12	1.28713	-4.16022	2.43067	-2.51365	-0.176893	-0.948059	-1.99115	0.715665	-3.53983	2351.37	669.51	-0.988481	2.24539
250	2454.18	2135.01	2293.51	2699.17	2186.68	3554.64	1278.12	2864.87	2748.36	1.83366	-0.751325	0.952468	-0.39204	-0.396019	-0.273165	1.11309	-1.21787	-0.4198	2468.28	623.178	0.0498884	1.00593
255	2525.47	2284.46	2368.66	2731.24	2314.4	3593.31	1473.32	2929.08	2894.57	1.52729	-0.4225	-1.6978	-0.267049	-1.21674	-1.14838	-0.816132	-0.703549	-3.41472	2568.28	580.895	-0.90662	1.30805
260	2584.02	2404.88	2428.61	2755.47	2416.75	3622.87	1652.62	2982.98	3021.54	0.829165	-0.756309	0.109364	1.32035	-0.166266	-2.51635	0.568911	0.932126	1.01384	2652.19	544.186	0.148315	1.19357
265	2631.22	2499.86	2474.09	2776.21	2498.98	3649.21	1816.89	3028.69	3129	0.311486	-3.54724	1.11329	-0.00623895	-1.73689	-2.01879	-0.815789	1.58625	-0.137534	2722.68	513.611	-0.583496	1.62589
270	2668.84	2576.69	2509.85	2793.28	2562.88	3670.24	1964.04	3067.86	3218.04	2.96727	-0.467689	1.06371	-0.827603	-0.713798	-0.696854	0.0704125	-0.288995	0.619831	2781.3	488.243	0.19181	1.22355
275	2697.23	2636.82	2536.93	2808.51	2615.25	3688.13	2094.7	3100.96	3289.9	-1.7221	0.687181	-2.59262	-2.60427	-0.823292	0.483968	2.32414	-1.25339	1.68356	2829.82	467.625	-0.424092	1.80423
280	2718.51	2683.32	2556.9	2819.14	2655.92	3699.93	2206.93	3127.17	3344.2	2.94826	-2.75233	-1.60519	0.162548	0.972232	-2.42771	-0.343791	3.25569	-1.85373	2868	450.507	-0.182667	2.22383
285	2735.36	2720.7	2573.28	2828.5	2688.72	3710.79	2300.56	3147.54	3386.28	1.17402	-1.62234	-0.171354	1.3612	0.592943	0.13608	1.6461	0.901601	3.20671	2899.08	437.351	0.802773	1.33549
290	2747.15	2750.28	2586.28	2835.34	2715.19	3717.91	2376.92	3164.38	3416.76	3.62485	-0.44866	-1.99238	1.56818	-0.0280036	0.36501	-0.551873	-1.40913	-0.829308	2923.36	426.784	0.0331879	1.69084
295	2757.25	2775.61	2595.73	2842.34	2736.21	3724.57	2438.86	3177.03	3442.03	-2.24738	-0.491095	1.96884	1.86278	0.817917	-0.177911	-2.52953	1.26969	0.795397	2943.29	419.05	0.140968	1.65088
300	2763.23	2795.58	2603.21	2846.51	2754.38	3728.91	2488.9	3187.88	3460.84	1.7225	0.559527	1.97634	2.27814	1.18313	0.0375312	1.20179	1.48194	0.49988	2958.83	412.937	1.21564	0.738865
305	2768.35	2812.22	2608.91	2850.81	2769.5	3733.19	2529.21	3197.13	3475.35	-0.780601	3.32668	2.09376	-2.21354	0.938248	-0.554645	1.40049	-0.999911	2.80722	2971.63	408.358	0.668633	1.90282
310	2771.22	2825.08	2615.05	2854.14	2783.05	3735.52	2560.8	3204.86	3486.62	-0.840021	-0.269765	0.708364	1.16689	2.32749	-0.00151411	0.705185	0.709062	0.118187	2981.81	404.527	0.513764	0.914978
315	2773.17	2834.94	2618.61	2858.45	2795.24	3737.7	2587.83	3210.97	3494.75	1.04607	0.42378	2.30415	1.14122	2.84888	-1.21245	0.864308	0.650139	-1.6902	2990.19	401.344	0.708433	1.45693
320	2774.45	2843.49	2620.45	2861.77	2804.45	3739.65	2609.52	3214.38	3499.67	3.25441	0.212505	1.96526	0.253559	1.8447	1.17601	0.986909	-0.432309	1.16265	2996.43	398.723	1.15819	1.10617
325	2775.52	2852.48	2622.84	2863.62	2813.49	3741.01	2627.92	3217.98	3503.5	-0.456576	-2.60737	1.12951	-0.776228	4.04194	0.408719	0.106378	2.7398	-0.905129	3002.04	396.282	0.409005	2.00689
330	2775.32	2860.17	2624.8	2865.32	2819.88	3741.18	2642.8	3221.08	3505.62	1.53387	-1.21061	1.23355	-1.14645	0.40458	1.07378	-0.827224	0.37711	0.497658	3006.24	394.098	0.21514	1.03855
335	2774.78	2866.62	2626.34	2866.16	2826.54	3740.61	2655.25	3223.94	3509.43	0.533398	-1.16193	-0.821905	-1.95311	-0.00593883	0.568079	-1.05958	1.32984	0.537393	3009.96	392.47	-0.225973	1.07051
340	2773.24	2871.55	2627.14	2867.41	2831.94	3740.25	2666.38	3226.55	3509.98	1.61973	-0.242289	0.202704	0.64294	2.65616	0.348154	-0.53998	0.696448	0.343898	3012.72	390.829	0.636419	0.972286
345	2770.84	2876.06	2626.58	2868.35	2836.99	3739.31	2674.83	3227.05	3510.43	0.492192	-0.0212538	1.57046	-0.47603	1.61471	2.89261	0.954792	3.57266	1.9655	3014.49	389.51	1.39618	1.31838
350	2767.84	2881.19	2628.13	2869.51	2841.19	3738.92	2682.5	3228.54	3510.49	2.89943	-1.65397	0.531716	0.00451997	0.0538465	-0.825237	1.47917	-0.449003	0.194654	3016.48	388.223	0.248347	1.32199
355	2766.33	2884.19	2628.04	2870.8	2844.45	3737.75	2688.14	3228.66	3509.02	2.22369	-0.336653	-2.43558	1.77551	-0.276525	-0.957504	1.48881	1.33544	-0.0640652	3017.49	386.884	0.305902	1.51236
360	2766.18	2888.16	2627.83	2871.78	2847.37	3735.09	2693.9	3229.19	3507.42	0.245595	2.547	-0.0998996	-0.301932	-1.30632	-0.284396	3.23043	-0.19917	-0.422227	3018.55	385.097	0.378787	1.49157
365	2766.13	2890.03	2626.91	2872.71	2849.39	3732.79	2698.73	3228.18	3504.5	1.5529	0.174349	-0.601592	1.1227	-1.00478	0.0133361	0.40991	1.68664	0.380213	3018.82	383.41	0.414854	0.913952
370	2762.97	2892.06	2625.5	2872.77	2851.78	3729.33	2703.36	3227.59	3503.16	2.90014	1.57823	2.34454	-0.864323	-1.14174	0.765782	-0.122443	0.390512	-0.925556	3018.72	382.095	0.547238	1.47328
375	2759.58	2894.69	2626.12	2872.86	2854.67	3726.59	2705.83	3226.96	3501.19	1.61743	1.72334	-2.49381	-0.255004	2.23433	0.275745	-0.800027	-0.00777323	0.481115	3018.72	380.786	0.308371	1.45577
380	2755.93	2896.27	2625.06	2872.23	2857.55	3723.87	2708	3224.02	3497.89	-0.747075	0.471222	-0.279965	-1.52358	-0.434076	1.07426	-1.31061	-0.785861	0.714235	3017.87	379.472	-0.313495	0.900222
385	2753.94	2897.93	2624.58	2872.59	2860.19	3722.33	2711.24	3222.93	3495.48	1.68037	-0.572093	-1.56637	0.256127	-1.68493	0.044172	-1.95193	0.493696	0.182698	3017.91	378.343	-0.346474	1.19988
390	2750.62	2897.23	2623.18	2871.7	2862.09	3720.38	2714.03	3220.5	3491.74	0.986238	-1.16734	1.72895	2.75187	1.97551	1.39571	0.716618	0.871173	1.35944	3016.83	377.3	1.1798	1.08059
395	2748.66	2897.28	2621.78	2871.08	2863.07	3717.4	2717.84	3221.19	3488.33	3.26578	-0.270999	2.14784	1.61157	-1.39188	-0.0699137	0.115368	-2.09655	-0.0893435	3016.29	376.069	0.357986	1.70128
400	2745.84	2898.72	2621.51	2871.28	2864.29	3713.35	2719.86	3220.06	3485.11	2.36507	-2.5227	-1.52283	-1.32411	1.43286	0.425752	-1.79318	0.135479	0.556064	3015.56	374.503	-0.249733	1.62965
405	2744.18	2900.31	2620.14	2871.63	2865.16	3710.33	2721.35	3219.4	3482.19	-0.554319	0.476779	-0.326485	1.78304	-2.19014	1.14813	-1.99251	1.64352	0.76966	3014.97	373.358	0.0841875	1.46352
410	2740.14	2901.96	2619.41	2871.43	2865.47	3707.35	2721.81	3217.8	3479.16	-0.269372	0.292106	2.42013	0.588775	1.55126	2.3681	-0.535802	-2.50704	-1.04108	3013.84	372.435	0.318565	1.62476
415	2737.95	2901.72	2617.86	2870.46	2865.39	3706.2	2722.4	3215.9	3475.42	0.181873	1.61913	-1.99719	-1.30984	1.85214	0.40614	-0.484175	2.01272	3.94529	3012.59	371.863	0.691788	1.85399
420	2735.31	2901.23	2617.05	2870.7	2864.59	3703.97	2725.71	3215.04	3471.73	0.0515259	-1.37433	-0.30546	-6.54962	-0.597916	1.51237	1.20362	-0.671048	-0.831789	3011.7	370.789	-0.840295	2.33889
425	2731.88	2900.91	2616.39	2870.43	2866.22	3701.31	2728.45	3214.02	3469.71	2.01124	1.03527	1.03738	-2.13456	1.44635	1.05823	-0.812553	0.654582	0.810634	3011.04	369.874	0.567397	1.26538
430	2727.39	2899.79	2614.99	2869.51	2866.97	3697.92	2729.1	3212.37	3466.72	-0.0508688	-0.441647	0.0053477	0.289131	1.87513	1.51167	-2.0605	2.40625	0.610536	3009.42	369.109	0.46056	1.35009
435	2723.93	2900.14	2613.6	2868.41	2868.22	3694.04	2728.3	3209.2	3463.71	0.958409	2.28231	-0.389523	2.07947	-2.57336	1.05865	0.578244	0.0710478	1.17988	3007.73	368.093	0.582792	1.45864
440	2722.52	2900	2611.7	2867.12	2867.37	3690.97	2728.25	3205.8	3457.75	-2.38344	0.924374	-0.359411	-1.04115	-1.0876	0.66258	0.333888	-0.719305	2.78479	3005.72	366.728	-0.0983641	1.48607
445	2720.12	2899.45	2610.2	2866.07	2866.6	3687.21	2728.76	3203.78	3453.17	-1.50844	0.15879	-0.368665	-3.01217	1.90649	-0.491577	0.603156	0.966922	-0.76158	3003.93	365.498	-0.278565	1.43903
450	2717.2	2898.63	2608.37	2864.53	2866.91	3684.09	2729.38	3202.16	3450.04	1.50866	0.371576	-1.12629	0.0881643	-1.75167	0.787349	0.145017	1.94252	2.90868	3002.37	364.735	0.541555	1.45748
455	2713.67	2898.47	2606.54	2863.93	2868.18	3680.23	2729.35	3200.28	3447.98	1.19207	2.10295	2.07448	0.975465	1.33309	0.624003	1.09213	2.34023	-1.10526	3000.96	363.961	1.18102	1.03699
460	2711.14	2899.26	2605.3	2863.44	2868.55	3677.08	2732.06	3198.22	3444.57	2.8127	-0.18562	1.86525	-1.40901	2.30246	-0.905025	1.48808	-0.362238	-0.929565	2999.96	362.712	0.51967	1.59334
465	2707.6	2897.7	2604.29	2862.64	2867.65	3674.55	2731.75	3195.81	3439.96	0.863878	1.78422	0.423888	0.949153	-0.18834	-1.2448	1.51395	-0.378196	2.10011	2997.99	361.901	0.647097	1.09956
470	2705.15	2898.33	2603.92	2861.16	2867.06	3672.23	2733.25	3194.8	3436.79	-1.61797	0.297128	0.905152	0.736675	-0.263387	-1.18554	-2.86082	0.0293909	-1.2092	2996.97	361.04	-0.574285	1.23602
475	2702.24	2898.16	2602.87	2859.8	2867.72	3668.74	2731.23	3192.44	3433.85	0.808086	1.67472	1.95258	2.71548	0.0835273	0.160951	1.25221	0.913754	1.42456	2995.23	360.278	1.22065	0.844053
480	2698.99	2898.24	2601.37	2858.5	2869.41	3664.92	2731.2	3190.85	3431.27	0.015269	2.38669	-0.830623	1.7396	0.0317692	1.43767	1.23503	-0.266477	-0.127699	2993.86	359.408	0.624581	1.09443
485	2694.05	2895.55	2598.77	2857.35	2867.97	3660.9	2729.24	3188.68	3427.15	1.93741	1.33375	3.62704	-0.286475	0.920642	-2.29744	1.77214	2.09763	-0.74341	2991.07	358.943	0.929031	1.77556
490	2689.65	2894.28	2595.68	2856.65	2866.88	3657.92	2730.61	3186.52	3423.6	-0.628825	-0.0391284	-0.072261	0.783365	1.66813	-0.12127	-0.174945	-0.893005	1.08666	2989.09	358.438	0.178747	0.831756
495	2686.95	2893.55	2593.95	2855.54	2864.62	3654.49	2731.51	3184.89	3420.79	-0.771091	0.866088	-0.508637	-0.12009	0.753861	-1.27648	2.38772	-1.02854	-1.37035	2987.36	357.711	-0.118614	1.24126
500	2685.62	2892.21	2592.61	2854.66	2864.97	3651.64	2732.18	3182.5	3417.34	2.00933	0.142857	-0.846638	0.246221	-0.430344	0.13495	1.03714	1.30872	1.17724	2985.97	356.694	0.531053	0.913427
505	2682.97	2891.12	2590.63	2853.12	2863.71	3648.59	2732.1	3179.67	3413.39	2.36398	-1.81077	0.00979006	0.294982	-4.19966	0.968736	-1.53068	2.03763	3.27335	2983.92	355.91	0.156373	2.35902
510	2680.37	2890.41	2589.38	2851.62	2862.98	3646.31	2732.05	3178.29	3410.34	0.160367	0.137612	2.768	0.170876	-0.94174	0.0101516	1.72075	1.5712	-0.326822	2982.42	355.398	0.585599	1.17648
515	2677.63	2890.09	2588.06	2851.31	2862.15	3643.47	2731.6	3176.36	3407.78	2.80199	0.584499	-1.53967	1.63877	0.699737	0.441066	4.18405	0.579057	3.115	2980.94	354.793	1.38939	1.73581
520	2674.57	2888.9	2588.69	2849.43	2863.21	3640.07	2730.27	3175.22	3405.32	-1.45984	1.68936	0.646067	0.237753	-0.0556698	-1.1916	-2.50881	-0.612205	-0.971855	2979.52	353.988	-0.469645	1.25052
525	2671	2887.35	2586.43	2848.22	2863.11	3636.09	2728.37	3171.96	3400.76	0.103195	-0.813415	-1.4769	-0.769943	2.34545	-0.676057	-0.584393	0.238342	0.882324	2977.03	353.123	-0.0834879	1.14666
530	2666.88	2886.89	2584.8	2846.85	2862.65	3631.66	2728.5	3170.09	3398.12	-1.16665	0.581851	1.12719	0.940144	0.267306	0.816837	0.00788333	0.957933	-1.89582	2975.16	352.325	0.181852	1.04922
535	2664.88	2885.64	2581.45	2845.44	2860.97	3627.48	2727.67	3167.8	3393.65	1.02516	-0.593471	0.427589	0.0347023	1.69002	0.722563	0.325285	0.513569	1.20092	2972.78	351.446	0.594037	0.670942
540	2662.67	2884.79	2580.15	2843.49	2860.99	3623.07	2728.66	3166.33	3390.21	-1.62889	1.81541	0.215543	-0.674509	-0.350793	-0.706564	1.95451	1.3349	0.328914	2971.15	350.256	0.25428	1.23496
545	2659.95	2882.11	2578.69	2841.73	2859.57	3618.77	2728.42	3163.81	3386.93	-2.54583	0.233402	-1.50787	1.28179	0.977081	1.64116	2.56666	-1.33483	-0.441302	2968.89	349.335	0.0966955	1.68005
550	2657.7	2881.84	2578.12	2840.52	2859.76	3616.46	2730.35	3161.9	3384.56	0.344972	3.5226	1.40471	3.19878	-0.454096	1.14699	-0.766245	-1.69725	0.529445	2967.91	348.528	0.803323	1.73908
555	2654.04	2880.82	2576.32	2839.76	2858.94	3614.15	2729.66	3158.95	3382.23	0.509448	1.78279	-1.23886	0.847266	-0.904537	2.26205	3.03264	0.915688	-0.373973	2966.1	348.257	0.759168	1.44108
560	2651.03	2881.12	2574.48	2838.21	2858.62	3613.53	2728.54	3157.06	3377.86	-0.165196	1.26877	0.915446	3.25976	0.484411	-1.06168	-1.82558	0.422042	0.559582	2964.49	348.094	0.428618	1.44194
565	2647.24	2879.72	2573.35	2837.43	2857.21	3610.11	2726.75	3155.52	3375.15	-4.59931	-0.83879	-1.41412	2.12364	-1.6396	1.87741	2.59827	-1.08857	1.88993	2962.5	347.658	-0.12124	2.39675
570	2645.1	2878.99	2571.55	2836.87	2855.87	3608.31	2726.45	3153.7	3371.97	0.264164	0.499478	-2.31759	2.33751	0.890353	1.76382	0.508525	3.40066	-1.37065	2960.98	347.258	0.66403	1.76038
575	2642.36	2877.54	2570.37	2835.59	2855.95	3604.93	2726.49	3150.91	3370.05	-0.0301195	1.42027	-1.37654	1.40596	-0.295921	0.537493	1.50722	-0.829702	2.85275	2959.35	346.563	0.576824	1.34024
580	2638.66	2876.7	2568.91	2833.81	2854.9	3602.71	2725.88	3148.51	3366.22	-0.574442	0.117635	1.9704	1.34696	0.681994	-0.563555	1.14967	1.87854	-0.980701	2957.37	346.138	0.558499	1.1084
585	2636.1	2875.18	2567.93	2831.99	2853.75	3600.24	2726.11	3146.9	3362.99	-1.22459	-0.318123	0.317084	-0.53947	0.101691	1.38611	1.713	1.7982	-0.177316	2955.69	345.556	0.339621	1.06567
590	2634.75	2874.35	2567.7	2830.47	2852.35	3597.65	2724.62	3144.98	3359.82	-2.48165	-1.60879	-0.0646254	0.01963	-0.154797	-0.910467	0.120755	-0.455215	-0.111763	2954.08	344.809	-0.627435	0.887092
595	2632.94	2873.51	2565.37	2829.24	2852.37	3594.2	2723.53	3143.16	3356.3	2.00255	-2.56068	3.46741	-0.242525	-1.59359	-1.34515	0.581338	1.38324	0.0908975	2952.29	344.068	0.198166	1.90079
600	2629.69	2872.15	2563.98	2827.96	2852.05	3589.82	2722.79	3141.67	3353.79	-1.02202	-2.07506	0.981968	1.17455	2.05603	-1.82188	-0.157297	2.59378	1.33999	2950.43	343.318	0.341118	1.68603
605	2626.96	2871.17	2561.5	2827.05	2850.71	3586.01	2723.52	3140.08	3350.7	-2.12098	-1.78587	2.87892	-0.75091	0.136248	0.465985	-0.482295	0.445319	0.38321	2948.63	342.591	-0.0922637	1.46956
610	2624.1	2868.23	2560.01	2826.51	2848.76	3582.82	2723.62	3138.6	3348.95	-0.227627	0.570621	0.529189	-0.207256	-0.812323	-1.31075	-1.72964	1.76863	0.98441	2946.84	342.206	-0.0483058	1.12617
615	2621.92	2867.94	2558.42	2825.44	2846.82	3579.4	2723.32	3136.87	3347.16	1.08888	-0.00132896	-0.328058	0.171565	0.270044	1.14803	-0.658903	-0.369817	-0.180777	2945.26	341.658	0.126626	0.629773
620	2617.92	2866.53	2556.27	2823.26	2846.14	3576.85	2722.2	3135.85	3345.32	1.61463	1.4343	1.6556	-0.308301	-0.0760873	-0.822799	-0.868319	0.423426	-0.558007	2943.37	341.754	0.27716	1.04501
625	2615.24	2865.8	2554.67	2820.78	2845.53	3573.59	2721.13	3134.27	3343.98	0.0945354	-1.84405	0.195872	-0.668541	-1.32185	0.277642	2.48482	-0.322829	-0.677113	2941.66	341.476	-0.197946	1.23002
630	2612.36	2863.81	2553.59	2819.33	2845.95	3570.71	2719.91	3131.21	3339.31	3.01382	-0.278446	0.668776	-0.116733	-1.45067	-0.0442095	-1.20284	1.17768	-1.8955	2939.58	340.609	-0.0142358	1.50635
635	2610.97	2862.5	2552.21	2818.4	2845.04	3567.29	2719.69	3128.82	3335.37	-0.237286	-0.743168	-0.748251	-1.96212	0.755531	-0.669332	-1.63447	0.654718	-0.0235159	2937.81	339.56	-0.511989	0.920513
640	2608.94	2862.62	2550.49	2817.58	2843.14	3564.62	2719.61	3126.06	3331.85	-1.46796	0.322709	-1.27644	0.59848	1.57231	-1.69318	1.76098	-3.19066	-3.18988	2936.1	338.827	-0.729293	1.87934
645	2606.98	2862.74	2549.46	2815.68	2840.4	3561.74	2719.41	3123.91	3329.56	-3.25968	-1.63078	1.12222	-0.101892	-0.0824165	-1.59326	1.07676	-0.663273	-0.408115	2934.43	338.247	-0.615604	1.38993
650	2604.17	2862.35	2548.24	2814.63	2839.4	3559.02	2718.73	3121.92	3327.36	0.149072	2.96364	2.87494	-1.62257	2.16926	-0.107141	1.45871	-0.064881	0.502799	2932.87	337.816	0.92487	1.54544
655	2601.89	2860.32	2547.1	2813.34	2839.8	3555.65	2717.26	3120.04	3325.08	-1.77848	-0.66974	-0.994229	-0.463931	-1.13673	0.382766	1.6873	-1.29034	0.678126	2931.17	337.223	-0.398362	1.10666
660	2598.71	2858.34	2545.81	2812.81	2839.96	3553.68	2716.68	3119.33	3322.92	-2.11551	0.0124548	0.489353	-0.380635	-1.53955	-0.847285	-0.208219	3.18079	-2.07395	2929.8	337.092	-0.386951	1.62259
665	2595.03	2855.32	2545.61	2811.06	2839.88	3550.07	2716.52	3117.43	3320.81	1.39661	2.56482	-1.34231	2.56674	-2.18372	0.587065	-0.00596258	-0.682379	0.948668	2927.97	336.468	0.427727	1.64891
670	2591.6	2854.76	2543.53	2809.96	2837.89	3547.84	2715.96	3116.23	3315.76	-3.43611	-0.12397	-1.9644	-1.18023	-0.714354	0.0389146	-1.84246	-0.155703	1.12437	2925.95	336.026	-0.917105	1.35551
675	2589.15	2853.46	2542.29	2807.96	2836.91	3544.7	2715.37	3114.32	3312.98	-0.236954	2.2322	-0.527145	0.267932	-0.501969	2.39889	-2.26327	0.0695887	-0.524205	2924.13	335.442	0.101674	1.445
680	2586.95	2854.31	2540.06	2807.04	2835.61	3541.78	2713.73	3114.26	3309.49	2.929	-0.983051	-1.42094	0.621064	1.23164	-0.961504	-0.431876	-5.29441	1.96003	2922.58	335.039	-0.261116	2.39366
685	2585.07	2852.98	2540.62	2805.06	2835.3	3538.65	2713.16	3111.56	3308.94	1.13483	0.320773	-0.476241	-0.452021	0.783324	-1.31368	0.505215	0.206505	-0.638815	2921.26	334.373	0.0077658	0.779954
690	2581.86	2851.62	2538.06	2803.35	2833.54	3535.5	2712.46	3108.52	3306.1	0.260212	1.5316	1.13456	-0.295303	-0.56849	-1.44512	-2.66811	-0.664571	-0.768641	2919	334.008	-0.387096	1.27486
695	2579.26	2849.59	2536.42	2802.77	2831.93	3532.31	2711.98	3104.96	3302.42	-2.69057	-0.381433	0.543029	1.59011	-2.42104	0.0833063	-0.0743725	-0.439172	-0.946958	2916.85	333.216	-0.526344	1.35453
700	2576.41	2847.99	2534.11	2801.82	2830.59	3530.63	2712.41	3104.95	3299.88	-2.31366	-0.566765	1.21115	0.413477	0.623984	-0.0379114	-2.49207	-0.556073	-1.30138	2915.42	333.241	-0.557694	1.28047
705	2575.21	2847.4	2532.82	2801.79	2830.38	3528.43	2712.1	3104.68	3297.91	0.740106	1.21083	-0.077816	-1.17646	-2.77901	2.29968	-1.74121	0.565157	1.31182	2914.52	332.815	0.0392332	1.63835
710	2573.67	2845.97	2531.66	2799.72	2829.66	3526.63	2712.29	3103.8	3297.89	-1.39904	-1.66078	-1.36396	-1.83306	2.51215	0.204078	-0.638364	0.935195	1.23724	2913.47	332.83	-0.222947	1.52701
715	2571.53	2844.49	2530.27	2798.82	2828.74	3523.65	2711.35	3100.95	3294.5	-0.221415	-3.04521	-1.94845	-3.37115	0.224479	1.77433	0.414304	-2.92791	0.464972	2911.59	332.099	-0.959561	1.88268
720	2568.53	2842.87	2529.18	2797.47	2826.87	3520.31	2709.89	3099.76	3292.33	-2.85441	-2.70687	-1.64756	-0.266684	0.708975	-0.689922	0.753478	-0.412993	1.67654	2909.69	331.74	-0.604383	1.56127
725	2566.2	2842.61	2527.98	2794.98	2826.43	3517.47	2709.77	3097.77	3288.75	0.229058	-0.49386	-3.62518	0.973935	0.036832	-2.54447	-0.925206	-2.72365	-1.91119	2908	331.037	-1.22041	1.55663
730	2562.86	2841.63	2526.18	2792.53	2824.89	3514.41	2708.45	3095.55	3287.4	1.0652	0.203543	1.51114	-0.437258	0.562125	0.560573	0.667605	-4.08098	-3.54914	2905.99	330.945	-0.388578	2.01924
735	2560.64	2840.55	2524.77	2791.22	2825.17	3512.66	2708.24	3094.16	3284.81	-2.37053	-0.748474	-2.38604	-1.16022	0.810015	-1.78626	-2.95345	0.321956	-2.13142	2904.69	330.65	-1.37827	1.29125
740	2557.8	2838.05	2523.51	2790.62	2823.06	3509.93	2706.36	3092.55	3282.12	-0.139419	1.75011	-0.438451	-2.17056	-1.60172	1.87376	1.24211	1.54371	-3.18866	2902.67	330.359	-0.125457	1.8713
745	2556.26	2837.25	2523.42	2789.73	2822.66	3506.72	2705.79	3090.65	3279.37	1.02696	-2.89962	-0.0706228	-0.976858	-1.18039	-0.714237	-3.89633	-1.18303	-2.81796	2901.32	329.417	-1.41245	1.53671
750	2554.05	2837.19	2523.34	2787.53	2821.57	3503.4	2704.86	3086.58	3277.29	-0.441857	1.61484	-2.24304	-0.347121	-0.492111	-0.894752	1.22308	-3.52952	0.227493	2899.53	328.562	-0.542554	1.59504
