# Supplementary material for: A highly accurate platform for clone-specific mutation discovery enables the study of active mutational processes
Source: eLife. 2020 Apr 7;9:e55207. doi: 10.7554/eLife.55207 (PMC7228773; doi:10.7554/eLife.55207)
Supplement: Figure 1—source data 3. [file elife-55207-fig1-data3.xlsx]

## Sheet: Sheet1
Per well mapping rate, breadth and depth of coverage for runs D1110 and D1111
well ID	D1110.Mapping_Rate	D1111.Mapping_Rate	D1110.Breadth	D1111.Breadth	D1110.Depth	D1111.Depth
A001	92.4	94.37	3.07777	0.845157	1.54949	1.20371
A002	91.31	94.53	2.79234	0.661708	1.40598	1.24481
A003	90.84	95	3.308	0.864634	1.58781	1.29692
A004	91.34	94.65	2.36777	0.950618	1.36258	1.28284
A005	91.19	94.22	2.1939	1.13789	1.42409	1.23653
A006	91.66	94.36	2.67697	0.932281	1.48284	1.19968
A007	91.85	94.72	3.9471	1.46863	1.54647	1.32999
A008	91.92	94.61	2.74901	1.50108	1.51721	1.25396
A009	91.3	94.06	2.95239	1.97659	1.40319	1.22231
A010	91.85	94.62	4.013	1.75537	1.60787	1.3565
A011	91.63	94.88	5.18136	1.79549	1.70217	1.38807
A012	91.62	94.6	4.32623	1.93072	1.67469	1.32532
A013	91.26	94.61	3.88552	1.84095	1.38188	1.37837
A014	91.13	94.62	4.62798	1.40271	1.75059	1.25236
A015	91.05	94.51	4.62336	2.1764	1.74522	1.41649
A016	88.69	94.75	4.68154	2.07211	1.76038	1.39287
A017	91.56	94.92	4.89615	2.26962	1.76535	1.35757
A018	92.47	94.6	5.21415	1.75812	1.68217	1.48349
A019	92.11	94.5	5.72718	2.17151	1.86979	1.46014
A020	91.1	94.6	5.17069	2.38394	1.81974	1.37194
A021	91.74	94.7	4.67863	2.54794	1.84883	1.43706
A022	91.7	94.02	5.83146	2.348	1.71686	1.51649
A023	90.11	94.8	4.51949	2.00151	1.84991	1.42683
A024	92.62	94.57	6.57669	2.15187	1.76229	1.44396
B001	91.71	94.95	4.80343	2.00145	2.12778	1.45632
B002	91.18	94.41	5.33443	2.88179	1.86087	1.47351
B003	91.77	94.33	5.6567	2.90664	1.73101	1.40479
B004	92.3	94.56	5.83955	2.60795	1.87014	1.49967
B005	91.97	94.65	5.68357	2.19761	1.85473	1.42259
B006	91.99	94.29	6.00791	3.18104	1.78641	1.33716
B007	90.59	94.58	5.74119	2.53354	1.97939	1.42062
B008	91.62	94.2	3.87529	3.34471	1.66963	1.3976
B009	91.93	94.54	6.02619	2.78945	1.9886	1.84608
B010	91.9	94.7	6.16363	3.50797	1.81487	1.42734
B011	91.36	94.46	5.88475	3.01133	1.94104	1.52145
B012	92.05	94.08	4.11112	2.6412	1.6622	1.51926
B013	91.74	93.93	2.42982	3.05578	1.45852	1.60468
B014	92.24	94.74	7.46909	3.03248	1.86071	1.5228
B015	92.22	93.92	7.27958	3.09632	1.90477	1.39844
B016	91.02	94.02	6.00116	3.95605	1.81191	1.51498
B017	91.83	94.44	6.95838	3.7656	1.98767	1.55044
B018	91.8	94.5	4.28726	3.67241	1.77054	1.68797
B019	91.43	94.31	6.19637	3.81171	1.74647	1.56115
B020	91.95	94.2	5.93382	4.27313	1.88843	1.54655
B021	92.41	94.22	7.43977	3.19669	2.01713	1.80464
B022	90.65	94.25	7.51348	4.58005	1.92009	1.61775
B023	92.19	94.31	4.75768	3.74271	1.68956	2.10726
B024	91.66	94.34	4.94019	4.2822	1.67803	2.07259
C001	92.38	94.12	7.7099	4.98223	1.95875	1.6726
C002	92	94.53	4.19065	4.58003	1.67107	1.98499
C003	91.58	94.52	4.49781	4.0859	1.69343	2.19826
C004	92.02	94.49	7.51453	4.7313	1.91546	1.94717
C005	92	94.65	7.94579	1.67596	1.96817	1.36717
C006	89.24	94.19	5.10454	4.66772	1.84056	2.19993
C007	91.86	94.21	5.22546	5.05817	1.92924	2.21214
C008	91.34	94.34	5.66591	5.09623	1.82789	2.09909
C009	90.81	94.57	5.25121	4.15556	1.91387	1.84451
C010	91.37	94.13	6.09211	4.79849	1.72442	1.6123
C011	90.9	94.35	6.08205	5.84327	1.83083	2.04149
C012	91.73	94.21	8.97972	5.45859	2.03376	2.49306
C013	92.09	94.48	2.30975	2.1377	1.47567	1.35241
C014	91.57	94.34	4.16588	6.02467	1.60185	2.41893
C015	91.28	94.1	4.7932	3.19196	1.71454	1.67976
C016	92.01	94.11	5.19829	4.23334	1.59376	1.52087
C017	91.69	94.47	6.61865	2.04149	1.87514	1.33696
C018	90.86	94.11	2.51034	4.81156	1.34429	1.79571
C019	90.12	94.04	2.61958	4.85043	1.50272	1.78791
C020	91.68	94.51	5.55896	2.39246	1.58407	1.42005
C021	92.03	94.13	3.92829	6.39002	1.59044	2.53679
C022	91.49	94.43	7.16188	0.835507	1.98121	1.24167
C023	91.55	94.29	4.28535	6.84817	1.7441	2.22786
C024	91.51	94.34	3.79711	6.37634	1.60313	2.51106
D001	88.78	93.82	4.57277	6.32537	1.91809	2.50064
D002	90.9	94.34	3.75137	4.11578	1.36678	1.5218
D003	92.45	93.88	3.54915	4.34965	1.78621	1.91061
D004	91.21	94.1	4.10061	5.70112	1.57881	2.82632
D005	92.77	94.07	2.7678	6.25937	1.88421	2.71227
D006	90.92	94.56	4.42536	2.48496	1.59495	1.37167
D007	88.71	94.52	5.29464	1.90594	1.77764	1.28916
D008	91.31	93.91	4.13943	7.13039	1.63228	2.34366
D009	91.88	93.86	5.84451	7.13789	1.72724	2.382
D010	90.11	93.98	5.73431	6.87225	1.7684	2.63383
D011	90.76	94.69	5.78205	3.66096	1.79578	1.80021
D012	90.11	94.36	4.50887	4.66201	1.66842	2.23301
D013	90.77	94.45	5.56002	3.66457	1.63939	1.57828
D014	91.91	94.06	2.54038	7.02651	1.4961	2.82485
D015	91.17	94.26	5.58932	5.348	1.74818	1.89736
D016	91.77	93.99	5.45826	3.58922	1.69993	1.3563
D017	91.62	94.57	2.69257	4.96724	1.48415	2.05338
D018	90.4	94.04	5.66016	6.58717	1.65685	2.00927
D019	91.67	94.14	4.32577	2.76379	1.85558	1.31895
D020	91.87	95.1	4.58691	4.833	1.73748	2.43396
D021	89.54	93.45	5.21987	8.37259	1.87619	2.79821
D022	91.97	94.08	5.51479	2.78884	1.65498	1.55643
D023	92	94.02	5.70151	6.81213	1.78027	2.21476
D024	90.92	93.75	4.64306	6.17089	1.82683	2.40086
E001	92.38	94.15	4.11963	8.69482	1.753	2.48084
E002	90.68	94.61	5.3805	5.55104	1.62267	2.18591
E003	91.64	94.23	5.59592	5.32359	1.87321	2.31723
E004	91.28	94.09	4.11654	6.05038	1.58003	2.46341
E005	92.15	94.55	4.86068	2.49951	1.84737	1.39282
E006	92.02	94.3	4.79098	5.8358	1.66572	2.13313
E007	89.37	94.54	5.1926	2.84549	2.00673	1.71392
E008	91.16	94.57	5.38824	3.33055	1.88626	1.50517
E009	92.34	94.53	5.95486	5.29151	1.67371	2.29296
E010	90.79	94.39	4.33177	5.44123	1.71428	2.43805
E011	90.32	94.23	5.53366	8.63972	1.89721	3.24434
E012	92.01	94.55	7.06377	2.48086	1.82599	1.43211
E013	92.11	94.65	7.01061	2.0316	1.84246	1.47956
E014	91.43	94.6	5.83184	0.861256	1.61696	1.22728
E015	91.18	93.61	2.25507	7.87169	1.48678	3.44133
E016	91.89	93.97	3.37393	6.1007	1.54385	2.28371
E017	91.31	93.8	1.86221	7.12382	1.46171	2.54131
E018	91.15	93.89	1.85175	8.13639	1.30603	2.39956
E019	92.02	94.58	4.31826	3.58029	1.67999	1.74362
E020	90.21	93.84	4.83473	5.95177	1.74662	2.2736
E021	91.09	94.22	3.3362	6.90637	1.50963	2.65144
E022	90.89	94.53	4.53675	2.18386	1.69157	1.32935
E023	90.84	94.23	2.31092	4.94019	1.32351	1.85558
E024	91.36	93.53	3.88402	8.9211	1.83802	3.12407
F001	91.46	94.75	3.33006	3.90609	1.51153	1.78886
F002	91.77	93.99	2.87504	7.31415	1.4119	2.60844
F003	91.59	94.07	3.94253	7.52903	1.57827	2.60262
F004	91.81	94.62	5.05719	3.80201	1.78727	1.87508
F005	91.09	94.45	3.04996	3.81489	1.34217	1.68483
F006	90.74	94	4.78619	9.37141	1.86366	3.12094
F007	92.11	94.66	5.98508	2.5547	1.75189	1.35898
F008	91.32	94.64	5.60072	3.45602	1.74698	1.66602
F009	91.6	94.54	3.69878	1.88074	1.69541	1.27438
F010	92.25	93.83	4.0645	6.40011	1.63111	2.31767
F011	90.15	93.86	4.2208	9.77266	1.49885	3.33705
F012	90.83	94.41	4.57451	6.32849	1.56076	2.34446
F013	92.03	93.88	2.51937	6.47819	1.52028	2.40661
F014	91.03	94.55	2.19345	4.32351	1.47811	1.94256
F015	91.13	94.16	3.87683	2.91696	1.76591	1.39542
F016	90.83	94.65	3.17864	3.87617	1.57786	1.65546
F017	90.83	94.59	4.82573	4.51079	1.73662	1.99233
F018	91.8	93.76	3.82565	9.12027	1.66785	2.55774
F019	90.88	94.58	4.41095	4.83673	1.77947	2.09636
F020	91.84	94.4	4.15671	5.8532	1.68981	2.06265
F021	90.63	94.55	5.00104	4.33748	1.71123	1.84279
F022	91.58	94.02	5.44334	6.63358	1.62637	2.56639
F023	92.02	94.07	4.49954	6.4591	1.68838	2.38249
F024	91.58	94.34	3.38297	6.8697	1.50229	2.81888
G001	91.76	93.87	3.81803	8.51239	1.56356	2.64854
G002	91.35	94.07	3.70157	8.18488	1.57918	2.91403
G003	91.04	93.99	5.51296	7.28966	1.66941	3.15825
G004	91.98	94.57	4.53879	5.26304	1.7128	2.1264
G005	89.85	94.65	4.12144	5.04155	1.74369	1.91526
G006	90.95	94.1	3.12969	8.97002	1.51975	2.84918
G007	89.57	93.98	5.5986	6.99798	1.66211	2.54402
G008	90.6	93.96	4.77781	9.31458	1.87029	2.87657
G009	92.07	93.87	5.48369	6.57868	1.89215	2.55854
G010	91.09	94.59	1.77578	5.66784	1.38965	2.1372
G011	91.27	93.49	6.47167	6.72122	1.8569	2.44753
G012	90.13	93.56	2.45149	6.7682	1.60196	2.5273
G013	91.24	94.09	4.83911	7.29378	1.67563	2.80387
G014	91.89	94.25	4.99202	3.6164	1.59653	1.79224
G015	90.97	94.25	5.32267	3.58306	2.20488	1.73088
G016	90.94	93.81	1.91495	8.99278	1.40007	2.88904
G017	91.35	93.91	5.28284	6.63803	1.69366	2.24266
G018	89.32	93.61	4.44657	9.2228	1.77737	2.90396
G019	91.21	94.34	3.81587	5.93352	1.61156	2.02856
G020	90.27	93.58	2.83198	7.21373	1.45825	2.88562
G021	87.47	94.29	3.80548	1.58864	1.7776	1.41168
G022	90.85	93.72	4.07176	6.77279	1.97602	2.60637
G023	92.24	93.79	5.81137	7.17979	1.80415	2.72753
G024	91.91	94.55	5.09454	1.07705	1.62087	1.24205
H001	90.76	94.55	3.30974	1.22827	1.50966	1.35034
H002	89.34	93.7	3.78084	3.21191	1.52179	2.08398
H003	90.57	93.95	3.63835	7.40404	1.58122	2.6767
H004	90.83	94.93	3.03218	1.44371	1.47007	1.48383
H005	91.34	93.83	3.83504	8.88714	1.69854	3.04202
H006	90.52	93.74	2.34413	7.37616	1.35667	2.50151
H007	91.5	94.09	5.37902	6.71912	1.72921	2.42667
H008	89.89	94.47	5.0042	1.85934	1.85347	1.56345
H009	92.45	93.9	4.12208	7.17442	2.13471	2.88978
H010	91.05	94.56	4.70458	2.10032	1.76521	1.56687
H011	91.04	94.73	4.88058	0.628373	1.98485	1.28525
H012	88.88	94.1	4.87606	5.88537	1.85669	2.59417
H013	90.05	94.25	3.3345	6.53001	1.4929	2.98916
H014	90.78	94.65	5.64146	1.53215	1.85733	1.4878
H015	91.29	93.74	5.04152	4.23613	1.68986	2.14717
H016	91.09	93.7	4.30273	7.32938	1.82918	2.62394
H017	91.11	94.59	4.78422	1.85358	1.6238	1.56568
H018	90.9	94.43	3.1891	2.40883	1.4222	1.84338
H019	90.98	94.22	4.832	7.49026	1.81397	2.67301
H020	89.61	94.27	3.4059	4.65377	1.59072	2.03423
H021	90.8	94.14	2.21832	7.76466	1.49826	2.94199
H022	90.9	94	4.28966	5.73165	1.85112	2.51591
H023	91.46	94.76	2.37851	1.74092	1.55705	1.45404
H024	91.73	95.14	5.26067	1.21739	1.75009	1.67442
I001	91.37	94.05	3.12055	7.34617	1.45435	2.83103
I002	90.99	94.71	4.03205	1.53973	2.01091	1.45816
I003	88.75	94.43	4.0579	2.75967	1.77517	1.81268
I004	90.19	94.83	3.85602	1.91264	1.52258	1.55467
I005	88.97	94.34	3.52893	2.30627	1.53608	1.72123
I006	90.16	94.59	3.3012	2.22845	1.58364	1.69369
I007	90.59	94.02	4.85794	7.61274	2.08333	2.84638
I008	91.85	94.8	5.03545	1.97318	1.94636	1.47548
I009	89.2	94.6	3.28933	4.14149	1.43751	1.90893
I010	91.54	94.03	2.83024	5.55201	1.4987	2.5281
I011	91.27	94.9	5.78628	1.84631	1.66605	1.55835
I012	87.99	93.83	2.82438	5.34351	1.50518	2.43877
I013	90.63	94.34	4.17756	4.94441	1.70313	2.1147
I014	89.29	93.86	3.47803	8.07759	1.83331	2.69858
I015	91.43	94.31	1.70883	6.68898	1.45799	3.17094
I016	91.28	93.82	2.99472	8.44138	1.44513	2.80473
I017	90.85	94.4	3.62378	3.79765	1.80135	1.33256
I018	92.98	93.52	2.53358	7.96519	1.95368	3.37377
I019	91.27	94.5	5.10636	5.90445	1.70841	2.06942
I020	90.8	94.13	4.8801	6.98092	1.72164	2.7511
I021	91.19	94.36	2.145	4.79178	1.46563	2.37467
I022	91.18	94.13	3.47694	7.4289	1.52624	2.68343
I023	89.72	94.36	3.95628	2.89663	1.75253	2.3254
I024	90.97	94.27	2.82659	7.54313	1.37	2.83194
J001	91.86	94.51	1.82791	0.916602	1.46343	1.24666
J002	90.57	94.6	5.04438	1.91166	1.71797	1.35417
J003	90.47	94.48	4.10791	4.57854	1.51263	2.30864
J004	88.53	94.44	2.15813	1.98487	1.51794	1.48946
J005	91.72	94.26	6.01087	7.60175	1.82515	3.01502
J006	90.34	94.07	3.61494	6.16402	1.61952	3.13879
J007	90.78	94.49	4.9203	4.27731	1.89209	2.32011
J008	90.89	93.95	5.0634	8.29789	1.66463	2.53522
J009	90.58	94.41	4.31937	2.06677	1.66821	1.35005
J010	91.64	94.38	4.21407	2.87317	1.58578	1.68152
J011	92.04	94.14	4.67591	5.71615	1.98029	2.71891
J012	90.14	94.52	3.52203	4.03037	1.63815	2.07289
J013	91.78	93.97	3.14118	5.45402	1.52443	3.24811
J014	91.15	93.55	4.54895	9.21741	1.52276	3.23547
J015	90.49	94.39	2.39205	1.5048	1.55212	1.23174
J016	91.81	93.88	4.93049	8.24872	1.83167	3.15262
J017	90	94.14	2.80937	3.79202	1.48631	1.7556
J018	90.87	94.52	3.19088	2.91935	1.53561	1.48225
J019	91.27	94.27	4.61045	5.48869	1.7821	1.85715
J020	87.22	94.45	5.01139	3.41283	1.92853	1.56867
J021	90.33	94.32	4.0375	4.60267	1.89164	2.07807
J022	91.32	94.31	2.32673	7.5163	1.58975	2.93997
J023	91.58	94.2	4.42488	6.21777	1.82181	2.91413
J024	91.32	94.33	3.64448	4.71046	1.44162	2.58417
K001	89.91	94.18	3.80953	6.10763	1.77533	2.74591
K002	90.66	94.38	4.89193	5.65977	1.72275	2.54864
K003	91.31	93.73	4.49841	6.99158	1.423	3.23753
K004	86.63	94.24	4.60827	4.03449	1.71513	1.86463
K005	89.43	94.22	5.02008	2.32755	1.69542	1.37065
K006	91.59	93.13	4.48969	2.68795	1.72899	1.66512
K007	92.15	94.42	5.04191	5.80138	2.04222	2.986
K008	92.49	94.4	4.00911	4.08769	1.72552	2.06697
K009	91.17	93.61	3.8601	10.0569	1.61172	3.11675
K010	91.59	94.39	5.74933	2.49821	1.58136	1.45653
K011	91.7	94.22	0.819099	2.24594	1.38701	1.39894
K012	92.05	94.27	1.80785	2.72844	1.43203	1.7863
K013	91.02	94.68	3.38055	0.627865	1.43814	1.28643
K014	90.8	93.52	5.27962	4.58966	1.8312	2.20439
K015	92.13	94.53	3.21652	0.563914	1.88751	1.24512
K016	91.59	94.42	3.8683	3.47156	1.68138	1.65742
K017	92.22	93.66	2.49153	4.02359	1.48345	1.92742
K018	90.47	94.47	3.27545	1.97303	1.68771	1.45005
K019	91.83	94.23	2.69158	5.24346	1.40085	2.39186
K020	91.63	94.72	1.41661	1.59984	1.33356	1.46141
K021	92.07	93.87	3.92363	7.59159	1.68887	3.45244
K022	90.14	94.65	2.27127	1.88657	1.40137	1.47373
K023	92	94.17	3.20516	6.62828	1.61696	2.58414
K024	91.59	94.15	5.27817	0.991825	1.697	1.20937
L001	92.28	94.44	4.05499	2.13247	1.68298	1.801
L002	91.47	94.56	4.42346	1.84611	1.73114	1.44627
L003	91.75	94.24	3.27156	5.06795	1.38935	2.09371
L004	91.81	94.42	4.75388	2.44468	1.78862	1.43948
L005	91.89	93.65	2.48441	7.3397	1.42647	3.27809
L006	91.23	94.53	2.09909	2.0361	1.35914	1.44682
L007	89.71	94.85	4.02404	1.61896	1.85782	1.44752
L008	92.16	94.06	2.75051	4.45076	1.50699	2.01843
L009	91.6	94.19	3.85604	5.61068	1.74758	2.49429
L010	91.25	94.02	1.76876	7.01662	1.2902	2.39208
L011	91.89	94.85	4.37555	1.7364	1.60134	1.46007
L012	91.04	94.75	5.07387	1.39579	1.72593	1.39904
L013	91.44	94.86	5.25757	1.77091	1.72664	1.41793
L014	91.19	94.21	3.89014	5.81135	1.91386	2.25872
L015	91.65	94.05	5.43222	4.20256	1.85506	2.24017
L016	91.52	94.58	2.4152	1.58561	1.30607	1.40517
L017	90.92	93.79	5.25573	6.83322	1.83778	2.53942
L018	92.19	94.85	4.06949	1.3993	1.64466	1.43473
L019	91.51	94.89	2.79379	1.53827	1.58885	1.43867
L020	91.57	94.41	5.0843	3.89682	1.67454	1.95228
L021	91.75	94.27	4.10986	3.08542	1.74003	1.8835
L022	90.74	93.8	2.43671	6.64021	1.5703	2.47305
L023	92.13	93.83	3.89895	7.31718	1.59448	2.59231
L024	91.14	94.42	4.33444	4.43595	1.72445	2.43136
M001	89.74	94.39	4.35457	5.89872	1.83621	2.30018
M002	90.9	94.19	4.29822	2.87874	1.65464	1.87209
M003	91.93	94.34	4.09204	3.3323	1.62893	1.64852
M004	91.34	93.8	4.64897	6.21343	1.69914	2.36006
M005	91.79	94.25	4.07375	4.82431	1.64062	2.11508
M006	90.33	94.53	5.8366	4.27168	1.80112	1.96795
M007	92.19	93.74	2.06784	6.91977	1.37892	3.08861
M008	91.14	94.18	4.28128	6.28775	1.73338	2.52714
M009	91.87	94.38	4.12521	2.66053	1.63363	1.34478
M010	90.27	94.46	5.31585	4.52119	1.94092	2.11235
M011	92.13	94.51	2.63806	6.06563	1.48908	1.89973
M012	91.27	93.89	3.80636	8.26624	1.68596	2.58107
M013	90.75	93.97	6.57926	7.94076	1.68491	2.68293
M014	91.63	94.49	2.33954	4.11007	1.33362	2.12761
M015	91.44	94.4	4.38695	4.22831	1.77762	1.76956
M016	91.65	94.22	4.745	4.73904	1.72786	2.26996
M017	92.45	94.23	4.10516	2.76018	1.75015	1.69345
M018	91.99	94.11	4.94434	5.61585	1.81999	2.95601
M019	91.9	94.72	4.61869	2.05172	1.84702	1.49374
M020	90.78	93.94	4.52533	5.92397	1.65974	2.58459
M021	92.33	94.28	3.89111	4.74069	1.53491	2.10713
M022	91.66	94.15	6.22234	3.87896	1.83519	1.77391
M023	91.48	94.5	4.26593	1.69513	1.67808	1.52836
M024	92.16	94.22	4.36449	4.90589	1.66463	2.18676
N001	92.42	94.26	4.83387	5.83711	1.719	2.07022
N002	90.68	94.28	5.81447	6.49218	1.83144	2.6143
N003	91.89	94.21	5.90745	2.03771	1.869	1.48432
N004	91.54	94.45	2.93412	1.2568	1.33786	1.36576
N005	91.12	94.17	4.91565	8.02057	1.83159	2.87892
N006	91.06	94.7	5.51314	1.61433	1.95632	1.3605
N007	91.38	94.46	5.3599	1.79398	1.85991	1.43349
N008	91.31	94.23	5.90524	3.20231	1.7548	1.77327
N009	92.31	94.42	5.75624	4.04103	1.74299	2.28813
N010	92.19	94.23	4.55917	4.82397	1.93106	2.30668
N011	91.59	94.41	4.74627	1.11674	1.84365	1.34814
N012	92.78	93.93	4.22678	8.85692	1.78904	2.87386
N013	92.5	93.87	6.24331	8.33848	1.8681	2.66985
N014	90.87	94.21	5.72297	0.785927	1.7391	1.20312
N015	91.58	94.47	3.89486	2.27684	1.36457	1.50137
N016	90.89	94.67	6.0351	2.17042	1.83199	1.42
N017	92.43	93.94	4.96071	8.17435	1.84734	3.14336
N018	91.6	94.35	6.95629	5.04789	1.88666	2.26144
N019	92.41	93.65	5.90702	3.12111	1.94944	2.17194
N020	92.73	94.56	6.22464	1.81514	1.8415	1.35225
N021	91.66	94.42	4.56433	3.33674	1.80852	1.74319
N022	91.94	94.51	5.54096	2.04414	1.9831	1.41239
N023	92.23	94.45	3.69348	5.70962	1.73529	2.46624
N024	91.61	94.44	5.82646	2.21282	1.78405	1.46772
O001	92.3	94.19	4.68345	6.06353	1.719	2.80787
O002	92.46	94.12	5.27705	5.2095	1.77541	2.21158
O003	91.89	94.72	1.7784	1.49013	1.37875	1.34659
O004	92.65	93.75	4.99969	4.39831	1.83817	2.18394
O005	92.52	94.44	2.27033	3.65724	1.4423	1.93625
O006	92.21	93.95	2.60978	6.46399	1.59335	2.80117
O007	91.4	94.63	7.22868	1.84409	1.85173	1.42045
O008	92.38	94.38	4.50785	4.41292	1.72725	2.20858
O009	92.24	94.25	4.4779	7.69139	1.72541	3.06406
O010	91.22	94.45	5.06509	3.94725	1.85728	1.85539
O011	90.49	94.28	6.10845	3.74164	1.87356	1.67798
O012	91.22	94.33	5.65178	3.82099	1.85475	2.30803
O013	92.63	93.98	3.33394	5.02176	1.50397	2.09094
O014	91.43	94.04	5.52733	8.54194	1.67972	3.0657
O015	92.09	94.92	5.03925	2.09347	1.69322	1.50319
O016	92.18	94.35	5.16866	4.68429	1.79647	2.03435
O017	92.69	93.88	3.39333	8.9077	1.71768	2.99821
O018	91.74	94	4.62624	10.101	1.73932	3.32553
O019	92.6	93.97	3.29428	4.72441	1.5586	2.59222
O020	91.94	93.8	3.66482	5.72745	1.65851	2.70209
O021	92.51	94	3.19898	5.99068	1.50815	2.61192
O022	92.82	93.88	4.87151	9.67122	1.8552	3.18707
O023	91.81	94.04	3.69196	5.69132	1.52522	2.51924
O024	92.8	94.13	6.11418	5.61922	1.75785	2.38559
P001	92.66	94.08	6.29533	4.07324	1.8898	2.20494
P002	92.48	94.3	4.01018	6.03903	1.61311	2.27073
P003	92.77	94.14	4.53006	4.07246	1.7782	2.56992
P004	92.1	94.08	2.52889	5.85412	1.31827	2.62983
P005	92.01	94.2	6.07672	6.48957	1.78218	2.35477
P006	92.13	94.34	3.94212	4.52501	1.62299	2.20452
P007	92.26	94.36	3.35925	5.1195	1.33943	2.36622
P008	91.72	93.89	5.72948	6.78638	1.93128	3.37672
P009	92.54	94.09	6.62741	7.16391	1.93658	2.57808
P010	92.38	94.35	6.31535	5.99225	1.81159	2.67703
P011	91.96	94.42	3.75306	5.14252	1.598	2.07837
P012	91.77	93.91	5.08573	7.46943	1.71038	3.32847
P013	92.39	94.34	5.06675	5.04076	1.73724	2.6084
P014	92.71	94.34	6.60379	6.69561	2.05183	2.86796
P015	91.49	94.04	6.175	5.19897	1.75639	2.60903
P016	92.86	94.09	6.22274	6.47003	1.83664	2.68091
P017	92.42	93.92	4.93126	7.24335	1.92742	2.78498
P018	92.54	94.16	5.24368	6.69803	1.76737	2.81407
P019	92.79	93.78	5.49448	6.69987	1.83244	2.87233
P020	92.36	94.19	5.25392	6.78445	1.73912	3.20621
P021	91.25	93.96	2.70724	7.90469	1.50224	2.60691
P022	91.27	94.23	3.86328	6.08947	1.75714	2.61427
P023	90.39	94.03	4.03877	9.20399	1.75664	2.99651
P024	92.04	94.06	5.5245	7.93631	1.70559	3.25344
