# Supplementary material for: A highly accurate platform for clone-specific mutation discovery enables the study of active mutational processes
Source: eLife. 2020 Apr 7;9:e55207. doi: 10.7554/eLife.55207 (PMC7228773; doi:10.7554/eLife.55207)
Supplement: Figure 1—source data 4. [file elife-55207-fig1-data4.xlsx]

## Sheet: DigiPico Oligos
Oligonucleotides used in DigiPico library prepartion process.
Oligo name	Sequence	Comment
P5_Digi	AATGATACGGCGACCACCGAGATCTACAC[8bp index]ACACTCTTTCCCTACACGACGCTCTTCCGATC*T	DigiPico indexing adapters (Indices in other sheets)
P7_Digi	/5Phos/GATCGGAAGAGCACACGTCTGAACTCCAGTCAC[8bp index]ATCTCGTATGCCGTCTTCTGCTTG
P5_F	AATGATACGGCGACCACCGAGA
P7_R	CAAGCAGAAGACGGCATACGAG

## Sheet: 16 x 24 indexing
Dual indexing indices used to barcode each well of a 384-plate with a unique index1/index2 combination
Index 1	Index 2
TAAGGCGA	CTCTCTAT
CGTACTAG	TATCCTCT
AGGCAGAA	GTAAGGAG
TCCTGAGC	ACTGCATA
GGACTCCT	AAGGAGTA
TAGGCATG	CTAAGCCT
CTCTCTAC	CGTCTAAT
CGAGGCTG	TCTCTCCG
AAGAGGCA	TCGACTAG
GTAGAGGA	TTCTAGCT
GCTCATGA	CCTAGAGT
ATCTCAGG	GCGTAAGA
ACTCGCTA	CTATTAAG
GGAGCTAC	AAGGCTAT
GCGTAGTA	GAGCCTTA
CGGAGCCT	TTATGCGA
TACGCTGC
ATGCGCAG
TAGCGCTC
ACTGAGCG
CCTAAGAC
CGATCAGT
TGCAGCTA
TCGACGTC

## Sheet: 384 x 1 indexing
384 unique indices that can be used to barcoding all wells of a 384-plate based on only index 1
Index 1
CGTTGGTT
GCTCACAT
TTGAGTGC
TCCTTCTC
AGCTAGCA
AAGGAGGA
TGGTAGGA
TCGTACGT
ACGTGACA
AGTGCAGT
AAGGAACC
AACCTTCC
TTGTCCAC
TGACCTTG
TGCAACGT
CCAAGAAC
GTGGTGTA
GGTGTACC
CAGTCGTA
GAGATGCT
GAGGTTGC
TGAGTCGA
CTGATGAC
CGACTGAT
GTGTAGCA
GTTCACCA
TCTGAACC
GTAGAAGC
GCTACACA
AGAGTACG
ATGCTAGC
TGGTTGAC
ATGGTTCC
TGTCTGCA
TGCACGTA
AGTGGTTG
TTCGTTCG
CAGCTGAA
GGATCCTA
TCGTGCTA
GAGTCGAT
GTCTGCAT
TGGAGAAG
CGTTCCAA
AAGGTCAC
TCAACTCC
CTTGGACG
GCTAGGAT
GCATCGTG
GCTACTGT
GTACCTAC
ACAGACGT
GCTAGCTA
TTGACACC
CTGAGGTT
CCAACCAA
GGAGTTGG
GTAGCATG
GCAGTGAT
AGGTCCTT
TGGACAGT
GGTTGTGT
CTCAGATG
ACCTCCAT
AGGATGGT
AGGTTCGA
TGAGGAAC
CTGTGTTG
GTCCACTC
GGATGGAC
TGCTACTG
GTGATCGA
GGTCCTTC
CAACCAAG
GTCCTAGG
AGTCTGAG
TAGCTACG
AGGAACCT
CTTGTGGA
GCTTCCAC
GTACGACA
CGTACTCA
CCTGTCTT
CCAAGGTA
ACCTAGGT
CCATGCTT
GTTGATGG
CAGTAGCT
AGCAGGAT
TTGGACTG
TGGATCCA
ACGATGCA
TCACGTGT
CAGTGCAT
CGAGCTAC
CGTCTCTA
CGTGAGTA
GTCACGTC
AAGCTCCT
TTGCACCT
TCCAAGGA
CTTCCTTG
CTTGCAAC
CTTGGTTC
CGATGAGG
GAAGGTCT
GCTCTGTA
GGAACGAA
GGAAGCAT
ACCAACCA
TAGCATGC
GTGCATGA
TTCCATGG
TGTCCAAC
TCAGCACT
CATCGACA
GAGACTCA
TCGAAGTC
CTGCTTGT
GAACATGG
GGAGAACA
TGACAGCT
GTAGTCAG
AGTTCACC
CTCATGCA
CGAGACTC
GGACAGTA
GTACAGAG
CTACGTAG
ACTGTCCA
CTAGTCCT
CAAGGTTG
CCATGGAG
CGAACCTT
GACACCAT
GGATGTCA
TGTCGTAG
ATGCAGGT
TTGTCGTG
TGCTGCAA
GTTCGAGT
ATGCTGTG
ACACTGCT
TCATGAGC
TCGTCTCA
TGACGAGA
GATGCTAG
GACTGATC
GAGTAGTG
GTCAGTCT
AAGTCTCC
AGGTGAAC
TGGATGTG
CCTTGTGA
CGTCAACT
GCAAGTGA
ATCTGTCG
ATGCATCG
TAGCTGTC
CGTAGAGA
GTGAACAG
CGATCACT
CAACCTTC
GTAGCTGA
TCTTGGTG
GACATCCA
TCAGAGCA
TGCTCACA
GTACTGTC
GCATCTCT
AACGACCT
AGAACTGG
TTCCTCAG
CACAGGAA
CCTACGTT
GCTTGACG
CTCTCTCA
GATCTCTC
GATGAGAC
CTGGACAT
GGACTCAA
TCCAGGAC
CCTTCAAG
ACGTCTAG
TCTGTGTC
CTAGTGTG
ACAGGTTC
GCAGACTA
ACACGATG
ACGTACTG
ACGATCTC
CTAGCACA
ACACCAAC
CAACTCCA
ACTGCTAC
CTAGAGAC
ACTGAGAG
ACTGCATG
ACTCATGC
CATCAGTG
CGTACATG
ACCAAGTG
ACCTTGAG
TTCTCAGG
CTGAGCAA
GGTTCAGG
TACGTGCA
TGTGACAG
TGCAGTCA
TGCTGAGT
AACTGGTG
TAGTCTGG
GTCATGGT
ATCTGAGC
TCGAGTCT
GACGATCA
AGGACTTC
TTCCTGGA
TCTGGTCA
GGTCAAGC
GGTGTGAA
AGCATCAG
GCTGATCT
GCTGTAGT
CGTTGTAC
GAACTGGA
GATCCAGA
GTCGAGAA
AACCACGA
AACCAGAC
AACAGACC
ATGACGAG
AGAGATGC
AGTAGACG
AGCTCATG
TAGACGAC
CATCGTGT
CAAGTGGT
CTCCAGTT
CTCGTCTC
CTGACAGA
CTGTCTGC
GCATCAGA
CTAGGTGT
CCACTTGG
TACACAGC
ACTGTTGG
ACAGTAGC
ATGGACCA
AGTCACTG
TCACTGAG
CAACAACC
CGACTAGC
ACTAGCAG
AGACTCTC
CTACACTG
AGCTACAC
GTCACTAG
AGCAGCTA
CTGTGAGT
GTCGTACA
AACCAACG
CAAGTTCC
GGTTGCAG
AGTCGATC
AGCTGTGA
TCTCGACT
TGCATGCT
CTCTGCTA
GACTGTAG
GAGCACTA
GTCATCTG
AACACCTC
AACCTGGT
GTTCCAAG
ATCGTGCT
ATGAGCTG
GACTCTGA
GACGTGAG
CATGTCAG
GACTCACT
TCAGCTAG
ATCGAGTC
AGACGACT
AGCACTCT
TCGATCAG
TACACTCG
CAGTACGA
ACGACTGA
AGTACGAC
CAAGAAGG
CTACCAGT
TCAGTCAC
CCTGACAA
CTCCACAA
ACACAGTC
TCTACCTC
CATCACAC
ACACTCGA
AGTGACGA
AGGACCAA
CCAGAGTT
TTCGAGGT
CGAAGTCT
AGCATGTC
CAGACTAG
CAGCTCTG
AACAGTGG
TACGAGTG
CTGACTCT
GATGCATC
GACAGAGT
CCTTCTTC
GAAGCAGT
TACTCGAG
TAGCAGCA
CATGCTGA
CACATCAC
TGAACCAG
ACACGTCA
ACTCGAGA
ACGTAGAC
AGATGCTG
CAGTCACG
TCTAGTGG
CATGCACT
CTCTACGT
GATGACTG
CCTCAGGT
ACGACACT
ATCACACG
TCTCTAGC
CCACAAGA
GCACAACG
TGACACAC
CGACATCG
ACAGATCG
TTCGTGAC
CACAGTTC
CACTCCTT
CTCTCATC
GAGTACAC
GCAGTTCA
AGACGTAC
TGTAGCAC
CACATGTG
CACTGTCT
TCAAGCTG
ATCACTGC
CGTCATGA
ACCACGAA
CAGAGACT
GATGTCGA
AAGACAGG
TCTCGTTC
CTTCAAGG
ACATGCAC
AGCACAGA
TCATCGAC
TCTCATCG
CACGTACG
TCTCTCTG
CGACACGT
ACTCTACG
ATCTCGAC
TACGACAC
CACTAGTC
GAGTCAGC
ATCAGCAC
CAGAGTGA
CTCGATCT
CTCGTAGT
AAGCTTGG
GCTGAGGA
CCAACTTG
TAGCACAG
TCATGTCG
TCGACATG
CACTGAGA
CATGATCG
AGTAGTGC
CATGTAGC
AGACAAGG
ACGTCATC
