# Supplementary material for: A highly accurate platform for clone-specific mutation discovery enables the study of active mutational processes
Source: eLife. 2020 Apr 7;9:e55207. doi: 10.7554/eLife.55207 (PMC7228773; doi:10.7554/eLife.55207)
Supplement: Figure 2—source data 1. [file elife-55207-fig2-data1.xlsx]

## Sheet: Sheet1
Comparison of MutLX analysis with Platypus and ScCaller
	ScCaller		Platypus		MutLX
Run	FPs	True UTDs	FPs	True UTDs	FPs	True UTDs
D1111	793	178	841	484	26	238
D1110	713	NA	1634	NA	9	NA
DE011	712	NA	1759	NA	11	NA
GM12885	13280	NA	2970	NA	17	NA
