# Supplementary material for: A highly accurate platform for clone-specific mutation discovery enables the study of active mutational processes
Source: eLife. 2020 Apr 7;9:e55207. doi: 10.7554/eLife.55207 (PMC7228773; doi:10.7554/eLife.55207)
Supplement: Figure 2—source data 4. [file elife-55207-fig2-data4.xlsx]

## Sheet: Sheet1
Number of different mutation types in various sequencing runs
		Number of mutations in each category
		A>C	A>G	A>T	C>A	C>G	C>T
Artefacts	D1110	67	201	121	279	66	326
	D1111	78	66	107	65	69	70
	D1511	205	411	92	326	99	208
	D1210	144	280	857	620	141	451
	D1211	149	737	443	1738	300	1249
	D1212	154	655	374	1460	342	1133
	D1213	161	737	447	1374	265	1041
	D1214	147	470	332	635	169	825
	DE011	69	265	87	365	64	247
	DE111	64	483	294	1455	159	612
	D6311	238	748	225	688	121	632
		A>C	A>G	A>T	C>A	C>G	C>T
Real Variants	D1201	1189	2741	2270	3391	2377	3896
	D121X	26	65	45	75	44	70
	D1101	1655	2888	3265	4575	3129	4123
	D1111	31	55	36	45	79	84
	D1511	71	127	90	147	127	129
	DE101	212	636	339	750	328	1888
	D6302	1020	2171	1923	2775	1989	2675
