# Supplementary material for: A highly accurate platform for clone-specific mutation discovery enables the study of active mutational processes
Source: eLife. 2020 Apr 7;9:e55207. doi: 10.7554/eLife.55207 (PMC7228773; doi:10.7554/eLife.55207)
Supplement: Figure 2—source data 5. [file elife-55207-fig2-data5.xlsx]

## Sheet: Sheet1
Primer pairs used for targetted validation of UTD variants
Position	Forward	Reverse
chr1:43050977	AGTAGTGGTGGCCCTTCTTTCATTTTG	GGCACAATGGCTCACATCTATAATCCC
chr1:84044398	CTTACCTTAAATCGCTGGCCAGACTTC	CTAGGAATAGGAGGGAATTTCCGCAAC
chr1:168274409	GTGTGCACAGCAGGAAACTCCAATTAC	CATACCCCAAGGGTTTAATCAGCAGAG
chr2:33010682	CTTCCAATGCATCAGTTTCTCCTTGAC	GTAGTCCCAGCTACTTGGGAGGCTGAG
chr2:123789390	AGGGCACTACCAACAAAGTAAAATGGC	CAGGATGATCTCGATTTCCTGACCTC
chr3:121522102	GTGATCTCAACTCACCGTAACCTCTGC	GAGGTGAGCAGATCACTTAAGTCCAGG
chr3:129524269	CACGCCTGGCTATTGTTTTGTATTTTTG	TCTTTCCTTTTCATTGGCCTACAGTGTC
chr4:76733361	GATTCCTGCCTTTCACCTTTCTTTTCC	ATCTTGATCGGCCAAGAGCACCAAGAG
chr4:167932516	CTGGCAAGTACTAATCCAAAGGAAGGC	AATACTGGGGCATGGAAACAATGATG
chr6:73146508	CGAAGTCCTCCTAACCTCGTGATCTG	GGAGACAAATCAGGCCTTGAATGAGAC
chr15:59093127	ACTCCAGCCTGGGCAACAGAGTAAGAC	GATGCAGCGAGACTCTGTCTCAAAAAC
chr17:66520311	GAGACTGTGATTCAGCAAGGTAAGGGC	CCCAATACAAAGTGTTCTGTCCATCTCAG
chr17:66521158	ATGTGATTGATCAAGGAGAGACGGATG	ACCCAGCTACACACACTTCTTCACCAC
chr17:66523728	GCAGTGGCACAAAATCAGTTTGAGAG	TGATTTTTATTTTCCGCCAATATTATGCC
chr1:198871416	ATCCTGACATGAATGTTGCTCTGAGAC	TTTGTTCACTCTCATCCCCTTCCTAGC
chr1:205392201	CTTCACTGTGTCTCCTCCTCTTTGTCC	TGAGGAAAATACCGGATGTGGAAACTC
chr1:212152502	AGTGGGAAAGAGGTTCCCAATTTTCTC	AGAGAGAATGGAAAAGTGCCAACAGTG
chr2:165954947	CCAAGGAATCTTAAATTGACATCAAAACC	AAAGAGGGATGAGGAAGGGACTTTACG
chr3:55936181	ATGCTAACCCATAGATACCACCAGCAG	AAATTGAAGCGGAAGACTTCATTCTGG
chr3:80372726	AAACAAAACAGGGCAAAGGGAAAAGAC	TCATGTTTACGTTTTTCAAAGATACTGATTTTC
chr3:148085551	GCCCATAAACGTCAATATTGCCAACAG	AGGCATCCCTTAGCTGATGAAACAGTC
chr3:166385800	GAGGATAGGTTTTCTCTGCAAGAGCTG	CAAGGTCCCCAAGTAAGTGAAATGTTG
chr4:21723721	ACAGTGCTTACCTGTTAAGGGGCTCTG	TGTTTGTACTGGTGAAAGACTGAATAATGAGC
chr4:114452967	AGACATTCGACTTAAGAAGGGATGTGG	TGTGCTTTTAAAGAAAACTTCCAAATGAGG
chr4:187590704	GAAATCACGGCTTTACCTGAATGAAGC	CCATAGTGACATCTGGTGGTGGTTTTG
chr5:24745295	TTGTTCCATTTGGATGACAAAATGCTG	AGGTCAGACAAGATGGGAAAAGTCGTC
chr6:29409126	GTTGCAAGAAACAAGAAACCCAGGATG	CCAGTAGTACCACCCAAGAAACAAATGC
chr6:89320707	ATTGGCAAAAGCTTGCTTTCGTATCTG	TTGAAGGAGGGAAAATTCTCAAGGTTC
chr6:120042047	ATTGTGGTACAAGAGGGTGGCCTTATG	GGGAAAGCAAGAAATAACCCAGTACCC
chr7:11409022	GCTATGGGATTTGCCTTAGGTGTTACC	ATGATAGTGGGGAGTGAGATGGAACAG
chr7:16023731	ATTCAATGGAAAAGGCCACCAACTAGG	TCAAGATACCCGGAGATAGAAAAATATGTGTG
chr7:140434437	TCTCACTCATTTGTTTCAGTGGACAGG	TAGATTCTCGCCTCTATTGAGCTGCTG
chr8:28991687	TCCTGTTGATCCCAGAAGCTGTATTTG	ATTTCCCAGATGCAGAAGTCCAGTCTC
chr8:47633895	GAGGCAGTGACATGAAGGAAATGAAAG	GGTGGAATTCAGACAATTTTCATTATTTTGG
chr8:56078651	TGCTACTCAGGGTCAAGTGTGATGTTG	TATTTATTGGGCCACAATTTGGGAAAC
chr8:133086518	TAAACTCTTGAACCATCCCCTCACCTG	TCAAAGCTTGTGCTTATTCCACACCTC
chr8:134979562	AGTGGGAACTGCTTACCATGGACTACC	AGATGAGGCTCACCCATGAGTTTTTG
chr11:5653934	CTGGCCAACATAGTGGAGAGACTCAAG	AATACTTCCTCCGTGAGGACTGTGTGG
chr11:119730031	GGGTAGAATGATAGAGGGGACATCAGG	TGGGGAGTCCTGGGACTGATAACATAG
chr12:128816427	TAGTGGGACTGCTGGATCCAATGGTAG	TCATCAGGGCTTGAGCTTGAAACTATC
chr13:80467921	TATCATAGTGAGGATCGGTGGGAGACC	CTACCCCTGTCCATTTTGATTTGATTG
chr15:34394338	TAAGGCGGAAGTACTGCCCTTAACTCC	AAGGTCTCTTCTGGATGGTGTTTCTCC
chr15:81086223	TGAAAAACAAACACCACATGAAACTGG	ACTTTTCAAATCCCCAAAACCAGGAAC
chr16:80389783	AAATGTGAGAAAAGAGGGCTCAGCATC	AATCATGTGCAGTTGCTTCTTGGAAGG
chr17:10440734	GTACAGTCCAACCACGGTCTCATTCAG	CAACAGACACCTCCTTCAAGAACAAGC
chr17:57290575	TCAAATTGCCCTAAAGGTCTCCTACCC	CTTTATTTGGAGCAGGCCAAGAGTTTG
chr18:24891922	TTTGGAAAATTGCACTATCATGTTTGG	CTTTACTGAGACCCATGAATGCAGAGC
chr18:34756888	TGCCTTCTAGAATTAGGTGTGTCCATTG	TACATTAATGCAAATTCTGCCTGTTGC
chr18:52260039	CCTAGATCACAGGTTCCCCATCCTTAG	TGCTGATCCTGTTGTTTTCATTACATCC
chr21:40855807	TCTCCGAAAAGAGTTGATACCTCACTTG	CCCACTTCCATATCCTGGGTTCTACTG
chr22:25928538	TGTTGTCAGCAACTAAGATTTTCAGCATAAG	AAAGCTGCAATTACTTTTGCACCAACC
